# Supplementary material for: Relativistic quantum calculations to understand the contribution of f-type atomic orbitals and chemical bonding of actinides with organic ligands
Source: Royal Society of Chemistry journal article supplement (doi:10.1039/d2cp05399c), 2023-01-01
Supplement: d2cp05399c1.pdf [file d2cp05399c1.pdf]

## Supporting Information: Relativistic Quantum Calculations to Understand the Contribution of f-type Atomic Orbitals and Chemical Bonding of Actinides with Organic Ligands

Andy D. Zapata–Escobar,<sup>†,‡</sup> Srimanta Pakhira,<sup>¶</sup> Joaquin Barroso-Flores,<sup>§</sup>

Gustavo A. Aucar,<sup>\*,†,‡</sup> and Jose L. Mendoza–Cortes<sup>\*,||,⊥,#</sup>

<sup>†</sup>*Physics Department, Natural and Exact Science Faculty, Northeastern University of  
Argentina*

<sup>‡</sup>*Institute for modeling and innovative technology, IMIT (CONICET-UNNE), Corrientes,  
Argentina*

<sup>¶</sup>*Department of Physics, Department of Metallurgy Engineering and Materials Science  
(MEMS), Centre for Advanced Electronics (CAE), Indian Institute of Technology Indore  
(IIT Indore), Simrol, Khandwa Road, Indore, 453552, Madhya Pradesh (M.P.), India.*

<sup>§</sup>*Instituto de Química, Universidad Nacional Autónoma de México (UNAM), Circuito  
Exterior SN, Ciudad Universitaria, Coyoacán CP 04510 Ciudad de México, México*

<sup>||</sup>*Department of Physics, Scientific Computing, Material Sciences and Engineering,  
High-Performance Material Institute, Condensed Matter - High Magnetic Field National  
Lab, Florida State University, Tallahassee FL, 32310, USA.*

<sup>⊥</sup>*Department of Chemical and Biomedical Engineering, FAMU-FSU Joint College of  
Engineering, Tallahassee, FL 32310, USA.*

<sup>#</sup>*Current address: Department of Chemical Engineering & Materials Science, Michigan  
State University, East Lansing, Michigan 48824, USA.*

E-mail: gaaucar@conicet.gov.ar(G.A.A.); jmendoza@msu.edu(J.L.M.-C.)

## Abstract

The nuclear waste problem is one of the main interests of the rare earth and actinide elements chemistry. Studies of Actinide-containing compounds are at the frontier of the applications of current theoretical methods due to the need to consider relativistic effects and approximations to the Dirac equation in them. Here, we employ four-component relativistic quantum calculations and scalar approximations to understand the contribution of f-orbitals in the chemical bonding of actinides (Ac) to organic ligands. We studied the relativistic quantum structure of an isostructural family made of Plutonium (Pu), Americium (Am), Californium (Cf), and Berkelium (Bk) atoms with the redox-active model ligand; DOPO (2,4,6,8-tetra-tert-butyl-1-oxo-1H-phenoxazin-9-olate). Crystallographic structures were available to validate our calculations for all mentioned elements except for Cf. State-of-the-art relativistic calculations were performed at different levels of theory to investigate the relativistic effects and electron correlations: 1) the scalar relativistic zeroth order regular approximation (ZORA) in the hybrid density functional theory (DFT) and 2) the four-component Dirac equation with the Dirac-Hartree-Fock (4c-DHF) and Lévy-Leblond (LL) Hamiltonians. We show that scalar DFT-ZORA could be an efficient first approximation to predict and investigate the geometry and electronic properties of actinides that are difficult to synthesize or characterize, and that the higher level of theory, the 4c-DHF, gives closer results to experiments than scalar DFT-ZORA. We performed spin-free calculations of geometric parameters for the Americium compound and found that they are the same as that of DFT-ZORA. To the best of our knowledge, this is the first time that such kind of large actinide compounds (the largest contains 67 atoms and 421 electrons) are studied with highly accurate four-component methods (all-electron with 6131 basis functions for the largest compound). We show that relativistic effects play a key role in the nature of f-type atomic orbitals contributions to the frontier orbitals of Ac-DOPO compounds.

Table S1: Pu-N and Pu-O bond distances at the ZORA-DFT level w.r.t. experiments.

| Bonds             | Bond Length Å      |             |          | Difference w.r.t. Experiments Å |          |
|-------------------|--------------------|-------------|----------|---------------------------------|----------|
|                   | Expt. <sup>1</sup> | ZORA-DFT-D3 | ZORA-DFT | ZORA-DFT-D3                     | ZORA-DFT |
| Pu-N <sub>1</sub> | 2.412              | 2.447       | 2.515    | 0.035                           | 0.103    |
| Pu-N <sub>2</sub> | 2.538              | 2.452       | 2.515    | -0.086                          | -0.023   |
| Pu-N <sub>3</sub> | 2.542              | 2.46        | 2.538    | -0.082                          | -0.004   |
| Pu-O <sub>1</sub> | 2.400              | 2.472       | 2.482    | 0.072                           | 0.082    |
| Pu-O <sub>2</sub> | 2.425              | 2.483       | 2.585    | 0.058                           | 0.160    |
| Pu-O <sub>3</sub> | 2.289              | 2.447       | 2.489    | 0.158                           | 0.200    |
| Pu-O <sub>4</sub> | 2.289              | 2.467       | 2.481    | 0.178                           | 0.192    |
| Pu-O <sub>5</sub> | 2.344              | 2.457       | 2.476    | 0.113                           | 0.132    |
| Pu-O <sub>6</sub> | 2.387              | 2.457       | 2.526    | 0.07                            | 0.139    |
| RMSD              |                    |             |          | 0.104                           | 0.132    |

Table S2: The equilibrium first coordination bond distances (C-C, C-N, C-O, excluding the Pu-O and Pu-N bonds) at the ZORA-DFT level compared to experimental values.

| Bonds                            | Expt. <sup>1</sup> Å | ZORA-DFT-D3 Å | Difference Å |
|----------------------------------|----------------------|---------------|--------------|
| C <sub>1</sub> -N <sub>1</sub>   | 1.345                | 1.344         | -0.001       |
| C <sub>1</sub> -C <sub>2</sub>   | 1.423                | 1.435         | 0.012        |
| C <sub>2</sub> -O <sub>2</sub>   | 1.316                | 1.284         | -0.032       |
| C <sub>4</sub> -O <sub>6</sub>   | 1.425                | 1.283         | -0.142       |
| C <sub>3</sub> -C <sub>4</sub>   | 1.323                | 1.436         | 0.113        |
| C <sub>3</sub> -N <sub>1</sub>   | 1.331                | 1.340         | 0.009        |
| N <sub>2</sub> -C <sub>5</sub>   | 1.316                | 1.338         | 0.022        |
| C <sub>5</sub> -C <sub>6</sub>   | 1.454                | 1.439         | -0.015       |
| C <sub>6</sub> -O <sub>1</sub>   | 1.272                | 1.281         | 0.009        |
| N <sub>2</sub> -C <sub>7</sub>   | 1.331                | 1.344         | 0.013        |
| C <sub>7</sub> -C <sub>8</sub>   | 1.439                | 1.435         | -0.004       |
| C <sub>8</sub> -O <sub>3</sub>   | 1.286                | 1.284         | -0.002       |
| C <sub>9</sub> -N <sub>3</sub>   | 1.321                | 1.343         | 0.022        |
| C <sub>10</sub> -O <sub>4</sub>  | 1.271                | 1.284         | 0.013        |
| C <sub>11</sub> -O <sub>5</sub>  | 1.273                | 1.286         | 0.013        |
| C <sub>11</sub> -C <sub>12</sub> | 1.439                | 1.436         | -0.003       |
| N <sub>3</sub> -C <sub>12</sub>  | 1.332                | 1.343         | 0.011        |
| RMSD                             |                      |               | 0.046        |

Table S3: Pu-O and Pu-N average bond distances of the Pu-DOPO complex at the ZORA-DFT level compared to experimental values.

| Bond | Charge  | Expt. <sup>1</sup><br>Å | ZORA-DFT-D3<br>Å | Diff. w.r.t.<br>Expt. Å | ZORA-DFT<br>Å | Diff. w.r.t.<br>Expt. Å |
|------|---------|-------------------------|------------------|-------------------------|---------------|-------------------------|
| Pu-N | Pu=+4.0 | 2.497                   | 2.453            | -0.044                  | 2.468         | -0.029                  |
| Pu-O | Pu=+4.0 | 2.356                   | 2.464            | 0.108                   | 2.48          | 0.124                   |

Table S4: The equilibrium first co-ordination bond distances (C-C, C-N, C-O, excluding the Am-O and Am-N bond distances) at the ZORA-DFT level compared to experimental values.

| Bonds                            | Expt. <sup>1</sup> Å | ZORA-DFT-D3 Å | Diff. Å |
|----------------------------------|----------------------|---------------|---------|
| C <sub>1</sub> -N <sub>1</sub>   | 1.332                | 1.347         | 0.015   |
| C <sub>1</sub> -C <sub>2</sub>   | 1.462                | 1.449         | -0.013  |
| C <sub>2</sub> -O <sub>1</sub>   | 1.265                | 1.273         | 0.008   |
| C <sub>4</sub> -O <sub>6</sub>   | 1.272                | 1.272         | 0.0     |
| C <sub>3</sub> -C <sub>4</sub>   | 1.460                | 1.451         | -0.009  |
| C <sub>3</sub> -N <sub>1</sub>   | 1.328                | 1.347         | 0.019   |
| N <sub>2</sub> -C <sub>5</sub>   | 1.334                | 1.343         | 0.009   |
| C <sub>5</sub> -C <sub>6</sub>   | 1.457                | 1.450         | -0.007  |
| C <sub>6</sub> -O <sub>2</sub>   | 1.277                | 1.273         | -0.004  |
| N <sub>2</sub> -C <sub>7</sub>   | 1.342                | 1.343         | 0.001   |
| C <sub>7</sub> -C <sub>8</sub>   | 1.451                | 1.449         | -0.002  |
| C <sub>8</sub> -O <sub>3</sub>   | 1.266                | 1.273         | 0.007   |
| C <sub>9</sub> -N <sub>3</sub>   | 1.321                | 1.349         | 0.028   |
| C <sub>11</sub> -O <sub>5</sub>  | 1.268                | 1.449         | 0.181   |
| C <sub>12</sub> -C <sub>11</sub> | 1.321                | 1.449         | 0.128   |
| N <sub>3</sub> -C <sub>12</sub>  | 1.334                | 1.349         | 0.015   |
| C <sub>9</sub> -C <sub>10</sub>  | 1.457                | 1.448         | -0.009  |
| C <sub>10</sub> -O <sub>4</sub>  | 1.273                | 1.273         | 0.0     |
| RMSD                             |                      |               | 0.053   |

Table S5: Am-O and Am-N average bond distances at the three different levels of theory.

| Bond | Expt. <sup>1</sup><br>Å | ZORA-DFT-D3<br>Å | Diff. w.r.t.<br>Expt. Å | ZORA-DFT<br>Å | Diff. with<br>Expt. Å | 4c-DHF<br>Å | Diff. with<br>Expt. Å |
|------|-------------------------|------------------|-------------------------|---------------|-----------------------|-------------|-----------------------|
| Am-N | 2.57                    | 2.452            | -0.046                  | 2.554         | -0.016                | 2.623       | -0.054                |
| Am-O | 2.475                   | 2.579            | 0.105                   | 2.593         | 0.118                 | 2.541       | -0.066                |

Table S6: The Cf–N and Cf–O bond distance at the ZORA–DFT–D3 compared to experiments.

| Bonds             | Bond Length Å |             |          | Difference w.r.t. Expt. Å |          |
|-------------------|---------------|-------------|----------|---------------------------|----------|
|                   | Expt.         | ZORA-DFT-D3 | ZORA-DFT | ZORA-DFT-D3               | ZORA-DFT |
| Cf–N <sub>1</sub> | N/A           | 2.494       | 2.522    | N/A                       | N/A      |
| Cf–N <sub>2</sub> | N/A           | 2.485       | 2.511    | N/A                       | N/A      |
| Cf–N <sub>3</sub> | N/A           | 2.492       | 2.560    | N/A                       | N/A      |
| Cf–O <sub>1</sub> | N/A           | 2.545       | 2.548    | N/A                       | N/A      |
| Cf–O <sub>2</sub> | N/A           | 2.534       | 2.544    | N/A                       | N/A      |
| Cf–O <sub>3</sub> | N/A           | 2.567       | 2.548    | N/A                       | N/A      |
| Cf–O <sub>4</sub> | N/A           | 2.542       | 2.595    | N/A                       | N/A      |
| Cf–O <sub>5</sub> | N/A           | 2.528       | 2.562    | N/A                       | N/A      |
| Cf–O <sub>6</sub> | N/A           | 2.567       | 2.575    | N/A                       | N/A      |

Table S7: Cf–N, Cf–O, Bk–N, and Bk–O average bond distances of the Cf–DOPO and Bk–DOPO complexes in Å.

| Bond | Charge  | Expt. | ZORA-DFT-D3 | Diff. w.r.t. Expt. | ZORA-DFT | 4c-DHF | Diff. w.r.t. Expt. |
|------|---------|-------|-------------|--------------------|----------|--------|--------------------|
| Cf–N | Cf=+3.0 | N/A   | 2.49        | N/A                | 2.531    | N/A    | N/A                |
| Cf–O | Cf=+3.0 | N/A   | 2.547       | N/A                | 2.562    | N/A    | N/A                |
| Bk–N | Bk=+3.0 | 2.532 | 2.476       | -0.06              | N/A      | 2.585  | 0.05               |
| Bk–O | Bk=+3.0 | 2.454 | 2.539       | 0.09               | N/A      | 2.515  | 0.06               |

Table S8: Contributions of few primitives of Americium atom at the A) 4c-DHF and B) LL level of theory to the complex studied. The contributions of such primitives to the selected OM are  $\geq |0.05|$

| A. Level of theory: 4c-B3LYP. Am–DOPO. Basis set: cv3z (Am. O. N)/3-21G (C. H) |        |        |                 |            |            |   |            |
|--------------------------------------------------------------------------------|--------|--------|-----------------|------------|------------|---|------------|
| OM                                                                             | E [au] | E [eV] | Primitives (Am) |            |            |   |            |
| LUMO+3                                                                         | -0.019 | -0.508 | —               | —          | —          | — | —          |
| LUMO+1                                                                         | -0.020 | -0.550 | —               | —          | —          | — | —          |
| LUMO+2                                                                         | -0.109 | -2.976 | —               | —          | —          | — | —          |
| LUMO                                                                           | -0.111 | -3.008 | —               | —          | —          | — | —          |
| HOMO                                                                           | -0.196 | -5.322 | fxzz 0.132      | fxxz 0.108 | fxyy 0.097 | — | fzzz 0.087 |
| HOMO-1                                                                         | -0.197 | -5.365 | fyyz 0.132      | fyxz 0.096 | fyzz 0.090 | — | fxxz 0.089 |

|        |        |        |            |            |            |            |
|--------|--------|--------|------------|------------|------------|------------|
| HOMO-2 | -0.199 | -5.415 | fxyz 0.131 | fxxz 0.077 | fxyx 0.068 | fxyy 0.062 |
| HOMO-3 | -0.206 | -5.595 | —          | —          | —          | —          |
| HOMO-4 | -0.207 | -5.620 | —          | —          | —          | —          |
| HOMO-5 | -0.209 | -5.691 | —          | —          | —          | —          |
| HOMO-6 | -0.210 | -5.706 | —          | —          | —          | —          |

A. Level of theory: 4c-DHF. Am-DOPO. Basis set: cv3z (Am. O. N)/3-21G (C. H)

| OM     | E [au] | E [eV] | Primitives (Am) |            |            |   |
|--------|--------|--------|-----------------|------------|------------|---|
| LUMO+3 | 0.069  | 1.875  | py 0.633        | px 0.241   | —          | — |
| LUMO+2 | 0.012  | 0.338  | —               | —          | —          | — |
| LUMO+1 | 0.003  | 0.072  | —               | —          | —          | — |
| LUMO   | 0.001  | 0.039  | —               | —          | —          | — |
| HOMO   | -0.277 | -7.525 | —               | —          | —          | — |
| HOMO-1 | -0.277 | -7.547 | —               | —          | —          | — |
| HOMO-2 | -0.279 | -7.587 | —               | —          | —          | — |
| HOMO-3 | -0.295 | -8.038 | —               | —          | —          | — |
| HOMO-4 | -0.296 | -8.059 | —               | —          | —          | — |
| HOMO-5 | -0.297 | -8.091 | —               | —          | —          | — |
| HOMO-6 | -0.357 | -9.707 | fxyy 0.271      | fxyx 0.271 | fxxx 0.091 | — |

A. Level of theory: sr-ZORA-B3LYP-D3. Am-DOPO. Basis set: cv3z (Am. O. N)/3-21G (C. H)

| OM     | E [au] | E [eV] | Primitives (Am) |            |            |            |
|--------|--------|--------|-----------------|------------|------------|------------|
| LUMO+3 | -0.079 | -2.142 | fxyz 0.377      | fzyx 0.241 | fxxx 0.162 | fyyy 0.110 |
| LUMO+2 | -0.142 | -3.859 | —               | —          | —          | —          |
| LUMO+1 | -0.153 | -4.152 | —               | —          | —          | —          |
| LUMO   | -0.154 | -4.203 | —               | —          | —          | —          |
| HOMO   | -0.221 | -6.014 | fzzz 0.268      | fxyz 0.140 | fyyy 0.080 | fxxx 0.051 |
| HOMO-1 | -0.223 | -6.059 | fxxx 0.411      | fxyz 0.139 | fzzz 0.200 | fzyx 0.085 |
| HOMO-2 | -0.225 | -6.112 | fzzz 0.615      | —          | —          | —          |

| HOMO-3                                                                   | -0.230 | -6.272 | —               | —        | — | — |
|--------------------------------------------------------------------------|--------|--------|-----------------|----------|---|---|
| HOMO-4                                                                   | -0.232 | -6.307 | —               | —        | — | — |
| HOMO-5                                                                   | -0.233 | -6.327 | —               | —        | — | — |
| HOMO-6                                                                   | -0.234 | -6.363 | —               | —        | — | — |
| B. Level of theory: LL. Am–DOPO. Basis set: cv3z (Am. O. N)/3-21G (C. H) |        |        |                 |          |   |   |
| OM                                                                       | E [au] | E [eV] | Primitives (Am) |          |   |   |
| LUMO+3                                                                   | 0.069  | 1.871  | py 0.587        | px 0.234 | — | — |
| LUMO+2                                                                   | 0.012  | 0.322  | —               | —        | — | — |
| LUMO+1                                                                   | 0.001  | 0.029  | —               | —        | — | — |
| LUMO                                                                     | 0.001  | 0.009  | —               | —        | — | — |
| HOMO                                                                     | -0.277 | -7.535 | —               | —        | — | — |
| HOMO-1                                                                   | -0.278 | -7.561 | —               | —        | — | — |
| HOMO-2                                                                   | -0.28  | -7.611 | —               | —        | — | — |
| HOMO-3                                                                   | -0.296 | -8.052 | —               | —        | — | — |
| HOMO-4                                                                   | -0.297 | -8.069 | —               | —        | — | — |
| HOMO-5                                                                   | -0.298 | -8.097 | —               | —        | — | — |
| HOMO-6                                                                   | -0.361 | -9.825 | —               | —        | — | — |
| HOMO-7                                                                   | -0.361 | -9.836 | —               | —        | — | — |
| HOMO-8                                                                   | -0.362 | -9.858 | —               | —        | — | — |

Table S9: Contributions of few primitives of Berkelium atom at the A) 4c-DHF and b) LL level of theory to the complex studied. The contributions of such primitives to the selected OM are  $\geq |0.05|$

| A. Level of theory: 4c-B3LYP. Bk–DOPO. Basis set: cv3z (Am. O. N)/3-21G (C. H) |        |        |                 |            |            |            |
|--------------------------------------------------------------------------------|--------|--------|-----------------|------------|------------|------------|
| OM                                                                             | E [au] | E [eV] | Primitives (Bk) |            |            |            |
| LUMO+3                                                                         | -0.057 | -1.558 | fxzz 0.168      | fxyx 0.106 | fxxz 0.184 | fxyy 0.152 |
| LUMO+2                                                                         | -0.102 | -2.765 | —               | —          | —          | —          |

| LUMO+1                                                                                 | -0.109 | -2.977  | —               | —            | —            | —          |
|----------------------------------------------------------------------------------------|--------|---------|-----------------|--------------|--------------|------------|
| LUMO                                                                                   | -0.112 | -3.036  | —               | —            | —            | —          |
| HOMO                                                                                   | -0.195 | -5.307  | fyyz 0.151      | fxyy 0.117   | fxxz 0.100   | fxzz 0.066 |
| HOMO-1                                                                                 | -0.203 | -5.530  | —               | —            | —            | —          |
| HOMO-2                                                                                 | -0.204 | -5.562  | —               | —            | —            | —          |
| HOMO-3                                                                                 | -0.207 | -5.646  | —               | —            | —            | —          |
| HOMO-4                                                                                 | -0.208 | -5.663  | —               | —            | —            | —          |
| HOMO-5                                                                                 | -0.208 | -5.671  | —               | —            | —            | —          |
| HOMO-6                                                                                 | -0.211 | -5.749  | —               | —            | —            | —          |
| A. Level of theory: 4c-DHF. Bk-DOPO. Basis set: cv3z (Am. O. N)/3-21G (C. H)           |        |         |                 |              |              |            |
| OM                                                                                     | E [au] | E [eV]  | Primitives (Bk) |              |              |            |
| LUMO+3                                                                                 | 0.072  | 1.966   | py : 0.578      | px : 0.268   | fxyy : 0.054 | —          |
| LUMO+2                                                                                 | 0.013  | 0.364   | —               | —            | —            | —          |
| LUMO+1                                                                                 | 0.003  | 0.073   | —               | —            | —            | —          |
| LUMO                                                                                   | 0.001  | 0.01    | —               | —            | —            | —          |
| HOMO                                                                                   | -0.276 | -7.513  | —               | —            | —            | —          |
| HOMO-1                                                                                 | -0.279 | -7.598  | —               | —            | —            | —          |
| HOMO-2                                                                                 | -0.294 | -8.009  | —               | —            | —            | —          |
| HOMO-3                                                                                 | -0.295 | -8.032  | —               | —            | —            | —          |
| HOMO-4                                                                                 | -0.298 | -8.109  | —               | —            | —            | —          |
| HOMO-5                                                                                 | -0.36  | -9.787  | —               | —            | —            | —          |
| HOMO-6                                                                                 | -0.361 | -9.81   | —               | —            | —            | —          |
| HOMO-7                                                                                 | -0.362 | -9.862  | —               | —            | —            | —          |
| HOMO-8                                                                                 | -0.406 | -11.039 | fxyy : 0.171    | fxxz : 0.114 | fxxx : 0.063 | —          |
| A. Level of theory: sr-ZORA-B3LYP-D3. Bk-DOPO. Basis set: cv3z (Am. O. N)/3-21G (C. H) |        |         |                 |              |              |            |
| OM                                                                                     | E [au] | E [eV]  | Primitives (Bk) |              |              |            |
| LUMO+3                                                                                 | -0.112 | -3.038  | fzzz 0.788      | fxxx 0.06    | —            | —          |



| LUMO+2                                                                   | -0.142 | -3.867 | —               | —             | —            | — |
|--------------------------------------------------------------------------|--------|--------|-----------------|---------------|--------------|---|
| LUMO+1                                                                   | -0.151 | -4.119 | —               | —             | —            | — |
| LUMO                                                                     | -0.155 | -4.204 | —               | —             | —            | — |
| HOMO                                                                     | -0.228 | -6.204 | —               | —             | —            | — |
| HOMO-1                                                                   | -0.230 | -6.249 | —               | —             | —            | — |
| HOMO-2                                                                   | -0.231 | -6.276 | —               | —             | —            | — |
| HOMO-3                                                                   | -0.231 | -6.292 | —               | —             | —            | — |
| HOMO-4                                                                   | -0.234 | -6.365 | —               | —             | —            | — |
| HOMO-5                                                                   | -0.235 | -6.384 | —               | —             | —            | — |
| HOMO-6                                                                   | -0.259 | -7.040 | fzzy 0.352      | fyyy 0.087    | fzzz 0.063   | — |
| A. Level of theory: LL. Bk-DOPO. Basis set: cv3z (Am. O. N)/3-21G (C. H) |        |        |                 |               |              |   |
| OM                                                                       | E [au] | E [eV] | Primitives (Bk) |               |              |   |
| LUMO+4                                                                   | 0.065  | 1.776  | px : 0.445      | s : 0.351     | py : 0.218   | — |
| LUMO+3                                                                   | 0.049  | 1.331  | —               | —             | —            | — |
| LUMO+2                                                                   | 0.029  | 0.797  | —               | —             | —            | — |
| LUMO+1                                                                   | -0.013 | -0.345 | —               | —             | —            | — |
| LUMO                                                                     | -0.132 | -3.592 | —               | —             | —            | — |
| HOMO                                                                     | -0.184 | -5.019 | fxyy : 0.360    | fxxxy : 0.134 | fyyz : 0.107 | — |
| HOMO-1                                                                   | -0.223 | -6.08  | —               | —             | —            | — |
| HOMO-2                                                                   | -0.235 | -6.394 | fxxxy : 0.491   | fyyy : 0.159  | fxxx : 0.093 | — |
| HOMO-3                                                                   | -0.242 | -6.595 | —               | —             | —            | — |
| HOMO-4                                                                   | -0.25  | -6.796 | —               | —             | —            | — |
| HOMO-5                                                                   | -0.263 | -7.17  | fxyy : 0.104    | fyz : 0.100   | fxyz : 0.093 | — |
| HOMO-6                                                                   | -0.265 | -7.216 | fxyz : 0.131    | fyz : 0.119   | fxyy : 0.109 | — |
| HOMO-7                                                                   | -0.31  | -8.429 | fxxz : 0.363    | fyyz : 0.304  | fyz : 0.105  | — |
| HOMO-8                                                                   | -0.323 | -8.789 | fyyz : 0.024    | —             | —            | — |
| HOMO-9                                                                   | -0.33  | -8.967 | fzzz : 0.262    | fxxz : 0.230  | fxzz : 0.090 | — |

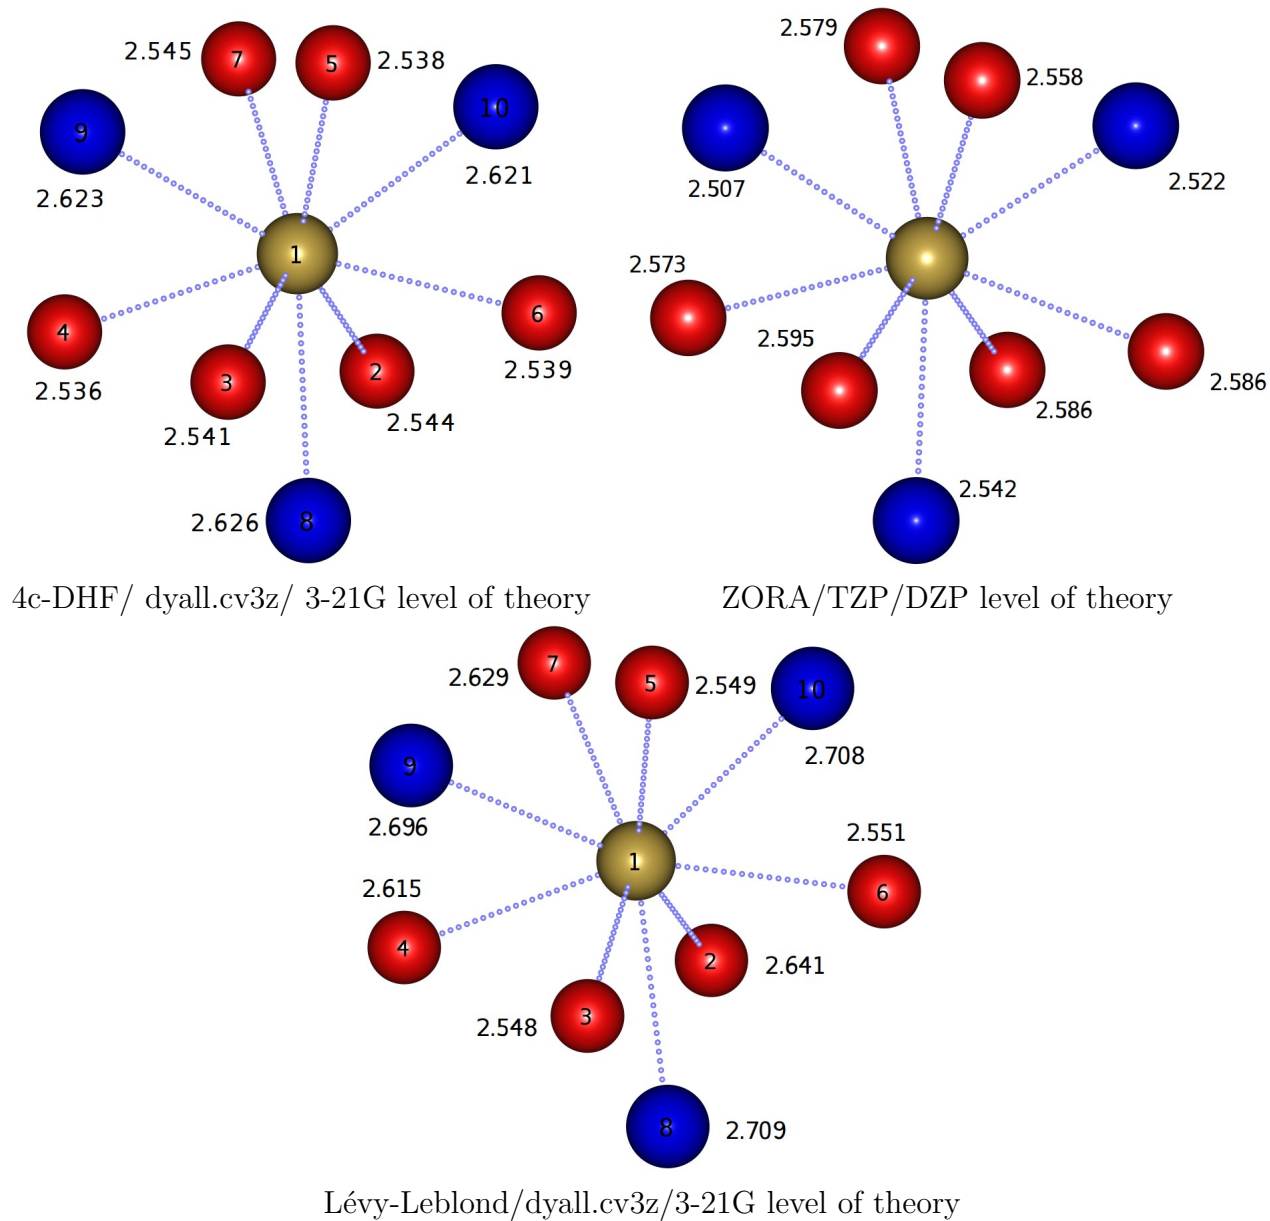

Figure S1: Distances of Am–O and Am–N,  $d(\text{Am-X}; X = \text{O}, \text{N})$ , calculated at different levels of theory: 4c-DHF, ZORA, and Lévy-Leblond. In red are the distances from Am to oxygens and in blue the ones to nitrogen. All distances given in Å.

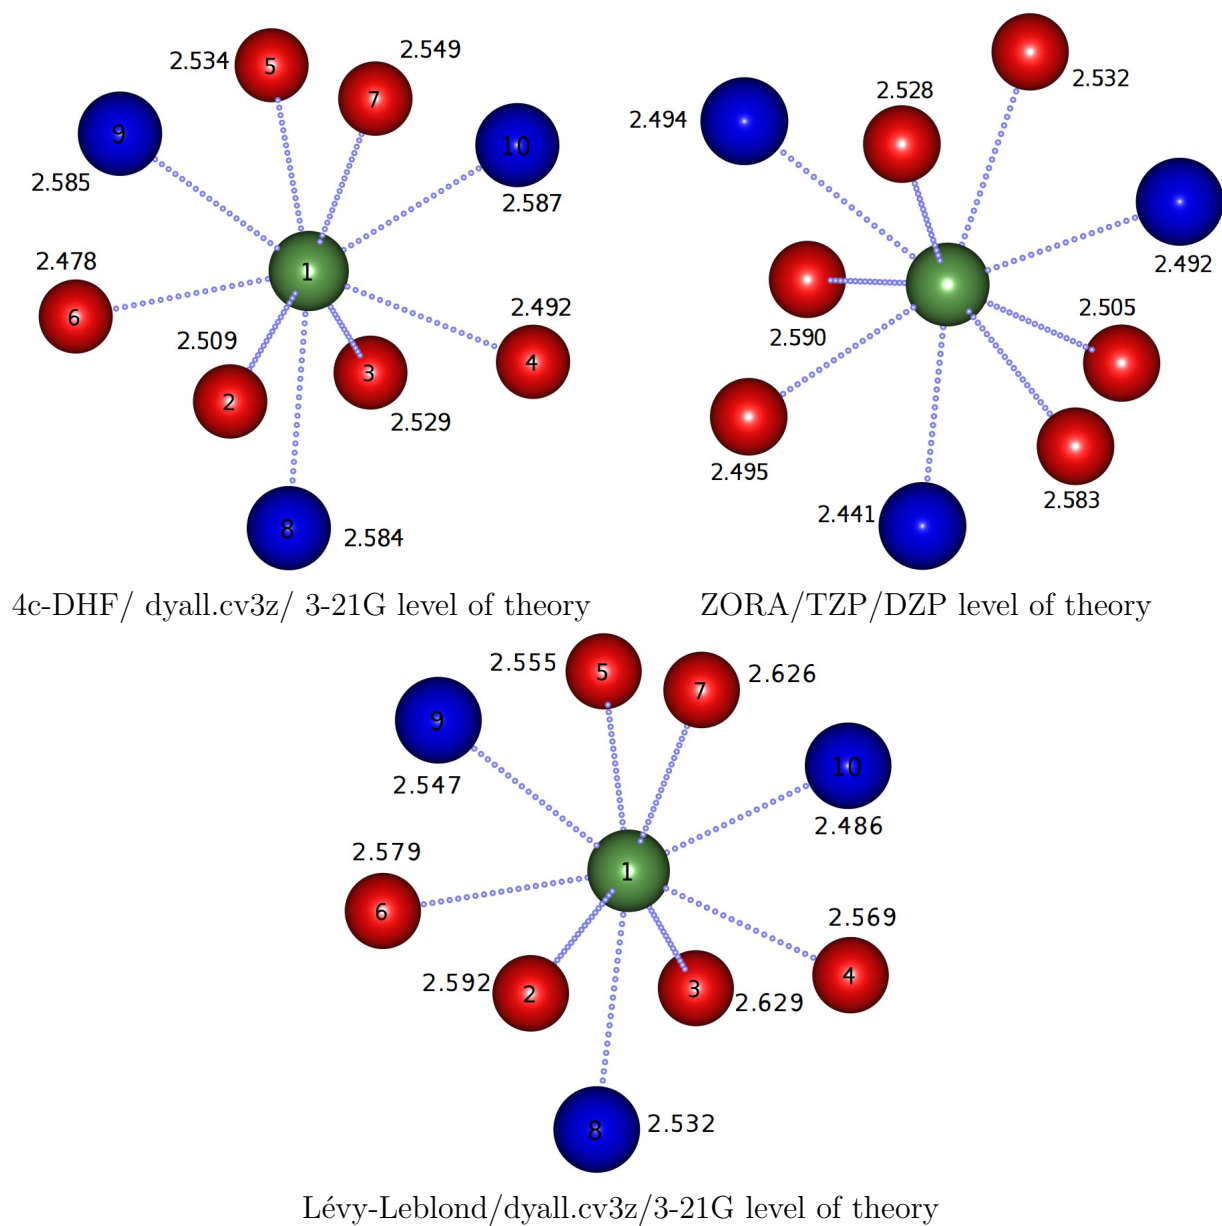

Figure S2: Distances of Bk–O and Bk–N,  $d(\text{Bk}-\text{X}; \text{X} = \text{O}, \text{N})$ , calculated at different levels of theory: 4c-DHF, ZORA, and Lévy-Leblond. In red are the distances from Am to oxygens and in blue the ones to nitrogen. All distances given in Å.

Table S10: Energies of Am(III).3DOPO<sup>-1</sup>, DOPO<sup>-1</sup>, and Am(III) in different multiplicities, M, in atomic units, and kj/mol calculated at different levels theory: HF, B3LYP, and B3LYP-D3 with the methodology sr-ZORA.

| sr-ZORA-HF / Am: TZP C, N, O, H: DZP       |                             |            |                    |            |         |            |                |           |  |
|--------------------------------------------|-----------------------------|------------|--------------------|------------|---------|------------|----------------|-----------|--|
| M                                          | Am(III).3DOPO <sup>-1</sup> |            | DOPO <sup>-1</sup> |            | Am(III) |            | Binding Energy |           |  |
|                                            | E [au]                      | E [kj/mol] | E [au]             | E [kj/mol] | E [au]  | E [kj/mol] | [au]           | [kj/mol]  |  |
| 1                                          | -31.835                     | -83581.53  | -10.211            | -26807.998 | 1.229   | 3226.496   | -2.432         | -6384.033 |  |
| 3                                          | -31.904                     | -83762.97  | -10.211            | -26807.998 | 1.02    | 2679.22    | -2.292         | -6018.197 |  |
| 5                                          | -31.474                     | -82635.354 | -10.211            | -26807.998 | 0.569   | 1493.357   | -1.411         | -3704.718 |  |
| 7                                          | -31.033                     | -81476.366 | -10.211            | -26807.998 | 0.241   | 631.77     | -0.641         | -1684.142 |  |
| sr-ZORA-B3LYP / Am: TZP C, N, O, H: DZP    |                             |            |                    |            |         |            |                |           |  |
| M                                          | Am(III).3DOPO <sup>-1</sup> |            | DOPO <sup>-1</sup> |            | Am(III) |            | Binding Energy |           |  |
|                                            | E [au]                      | E [kj/mol] | E [au]             | E [kj/mol] | E [au]  | E [kj/mol] | [au]           | [kj/mol]  |  |
| 1                                          | -20.814                     | -54646.313 | -6.609             | -17351.242 | 1.457   | 3825.971   | -2.445         | -6418.559 |  |
| 3                                          | -20.828                     | -54683.427 | -6.609             | -17351.242 | 1.417   | 3719.831   | -2.418         | -6349.533 |  |
| 5                                          | -20.756                     | -54495.79  | -6.609             | -17351.242 | 1.296   | 3402.346   | -2.226         | -5844.411 |  |
| 7                                          | -20.593                     | -54067.417 | -6.609             | -17351.242 | 1.096   | 2876.384   | -1.863         | -4890.076 |  |
| sr-ZORA-B3LYP-D3 / Am: TZP C, N, O, H: DZP |                             |            |                    |            |         |            |                |           |  |
| M                                          | Am(III).3DOPO <sup>-1</sup> |            | DOPO <sup>-1</sup> |            | Am(III) |            | Binding Energy |           |  |
|                                            | E [au]                      | E [kj/mol] | E [au]             | E [kj/mol] | E [au]  | E [kj/mol] | [au]           | [kj/mol]  |  |
| 1                                          | -21.008                     | -55156.898 | -6.659             | -17482.172 | 1.457   | 3825.971   | -2.49          | -6536.353 |  |
| 3                                          | -21.022                     | -55192.633 | -6.659             | -17482.172 | 1.417   | 3719.831   | -2.463         | -6465.947 |  |
| 5                                          | -20.951                     | -55006.375 | -6.659             | -17482.172 | 1.296   | 3402.346   | -2.271         | -5962.205 |  |
| 7                                          | -20.788                     | -54578.001 | -6.659             | -17482.172 | 1.096   | 2876.384   | -1.907         | -5007.868 |  |

Table S11: Energies of Am(III).3DOPO<sup>-1</sup>, DOPO<sup>-1</sup>, and Am(III) in atomic units, and kj/-mol calculated at different levels theory: HF, B3LYP, and B3LYPD3 with the methodology so-ZORA.

| so-ZORA: Am: TZP C, N, O, H: DZP |                             |            |                    |            |         |            |                |           |  |
|----------------------------------|-----------------------------|------------|--------------------|------------|---------|------------|----------------|-----------|--|
| Methodology                      | Am(III).3DOPO <sup>-1</sup> |            | DOPO <sup>-1</sup> |            | Am(III) |            | Binding Energy |           |  |
|                                  | E [au]                      | E [kj/mol] | E [au]             | E [kj/mol] | E [au]  | E [kj/mol] | [au]           | [kj/mol]  |  |
| HF                               | -32.023                     | -84075.888 | -10.211            | -26808.027 | -0.056  | -146.343   | -1.335         | -3505.464 |  |
| B3LYP                            | -20.997                     | -55126.377 | -6.609             | -17351.274 | 1.001   | 2627.985   | -2.171         | -5700.539 |  |
| B3LYP-D3                         | -21.008                     | -55156.898 | -6.659             | -17482.205 | 1.001   | 2627.985   | -2.033         | -5338.269 |  |

Table S12: Energies of Am.3DOPO, DOPO, and Am in different multiplicities, M, in atomic units, and kj/mol calculated at different levels theory: HF, B3LYP, and B3LYP–D3 with the methodology sr-ZORA.

| sr-ZORA-HF / Am: TZP C, N, O, H: DZP       |          |            |            |            |    |        |            |                |          |
|--------------------------------------------|----------|------------|------------|------------|----|--------|------------|----------------|----------|
| M                                          | Am.3DOPO |            | DOPO, M: 2 |            | Am |        |            | Binding Energy |          |
|                                            | E [au]   | E [kj/mol] | E [au]     | E [kj/mol] | M  | E [au] | E [kj/mol] | [au]           | [kj/mol] |
| 5                                          | -30.26   | -79447.925 | -10.164    | -26686.341 | 2  | -0.617 | -1620.262  | 0.85           | 2231.361 |
| 7                                          | -29.975  | -78699.885 | -10.164    | -26686.341 | 4  | -0.815 | -2138.546  | 1.332          | 3497.684 |
| 9                                          | -29.788  | -78209.281 | -10.164    | -26686.341 | 6  | -1.087 | -2854.842  | 1.792          | 4704.585 |
| 11                                         | -29.632  | -77797.751 | -10.164    | -26686.341 | 8  | -1.245 | -3269.67   | 2.107          | 5530.943 |
| sr-ZORA-B3LYP / Am: TZP C, N, O, H: DZP    |          |            |            |            |    |        |            |                |          |
| M                                          | Am.3DOPO |            | DOPO, M: 2 |            | Am |        |            | Binding Energy |          |
|                                            | E [au]   | E [kj/mol] | E [au]     | E [kj/mol] | M  | E [au] | E [kj/mol] | [au]           | [kj/mol] |
| 5                                          | -19.457  | -51084.896 | -6.476     | -17003.444 | 2  | -0.009 | -24.515    | -0.019         | -50.05   |
| 7                                          | -19.183  | -50364.286 | -6.476     | -17003.444 | 4  | -0.315 | -827.228   | 0.561          | 1473.273 |
| 9                                          | -19.103  | -50154.448 | -6.476     | -17003.444 | 6  | -0.33  | -866.046   | 0.656          | 1721.929 |
| 11                                         | -18.965  | -49791.398 | -6.476     | -17003.444 | 8  | -0.45  | -1180.207  | 0.914          | 2399.14  |
| sr-ZORA-B3LYP-D3 / Am: TZP C, N, O, H: DZP |          |            |            |            |    |        |            |                |          |
| M                                          | Am.3DOPO |            | DOPO, M: 2 |            | Am |        |            | Binding Energy |          |
|                                            | E [au]   | E [kj/mol] | E [au]     | E [kj/mol] | M  | E [au] | E [kj/mol] | [au]           | [kj/mol] |
| 5                                          | -19.652  | -51595.481 | -6.526     | -17134.537 | 2  | -0.009 | -24.515    | -0.064         | -167.355 |
| 7                                          | -19.377  | -50874.868 | -6.526     | -17134.537 | 4  | -0.315 | -827.226   | 0.516          | 1355.969 |
| 9                                          | -19.297  | -50665.033 | -6.526     | -17134.537 | 6  | -0.33  | -866.046   | 0.611          | 1604.624 |
| 11                                         | -19.159  | -50301.983 | -6.526     | -17134.537 | 8  | -0.45  | -1180.207  | 0.869          | 2281.835 |

Table S13: Energies of Am.3DOPO, DOPO, and Am in different multiplicities in atomic units, and kj/mol calculated at different levels theory: HF, B3LYP, and B3LYP–D3 with the methodology so-ZORA.

| so-ZORA: Am: TZP C,N,O,H: DZP |          |            |         |            |        |            |                |           |
|-------------------------------|----------|------------|---------|------------|--------|------------|----------------|-----------|
| Methodology                   | Am.3DOPO |            | DOPO    |            | Am     |            | Binding Energy |           |
|                               | E [au]   | E [kj/mol] | E [au]  | E [kj/mol] | E [au] | E [kj/mol] | [au]           | [kj/mol]  |
| HF                            | -32.023  | -84075.888 | -10.102 | -26523.032 | -1.318 | -3460.090  | -0.399         | -1046.703 |
| B3LYP                         | -20.997  | -55126.377 | -6.476  | -17003.449 | -0.539 | -1415.968  | -1.028         | -2700.063 |
| B3LYPD3                       | -21.008  | -55156.898 | -6.526  | -17134.542 | -0.539 | -1415.968  | -0.890         | -2337.304 |

Table S14: Energies of Bk(III).3DOPO<sup>-1</sup>, DOPO<sup>-1</sup>, and Bk(III) in different multiplicities in atomic units, and kj/mol calculated at different levels theory: HF, B3LYP, and B3LYP-D3 with the methodology sr-ZORA.

| sr-ZORA-HF / Bk: TZP C, N, O, H: DZP       |                             |            |                    |            |         |            |                |           |  |
|--------------------------------------------|-----------------------------|------------|--------------------|------------|---------|------------|----------------|-----------|--|
| M                                          | Bk(III).3DOPO <sup>-1</sup> |            | DOPO <sup>-1</sup> |            | Bk(III) |            | Binding Energy |           |  |
|                                            | E [au]                      | E [kj/mol] | E [au]             | E [kj/mol] | E [au]  | E [kj/mol] | [au]           | [kj/mol]  |  |
| 1                                          | -31.916                     | -83795.895 | -10.211            | -26807.998 | 1.377   | 3614.375   | -2.661         | -6986.276 |  |
| 3                                          | -32.146                     | -84399.863 | -10.211            | -26807.998 | 1.25    | 3282.938   | -2.765         | -7258.807 |  |
| 5                                          | -31.707                     | -83246.226 | -10.211            | -26807.998 | 0.78    | 2048.494   | -1.855         | -4870.727 |  |
| 7                                          | -30.99                      | -81364.94  | -10.211            | -26807.998 | 0.028   | 73.755     | -0.386         | -1014.701 |  |
| sr-ZORA-B3LYP / Bk: TZP C, N, O, H: DZP    |                             |            |                    |            |         |            |                |           |  |
| M                                          | Bk(III).3DOPO <sup>-1</sup> |            | DOPO <sup>-1</sup> |            | Bk(III) |            | Binding Energy |           |  |
|                                            | E [au]                      | E [kj/mol] | E [au]             | E [kj/mol] | E [au]  | E [kj/mol] | [au]           | [kj/mol]  |  |
| 1                                          | -20.846                     | -54730.549 | -6.609             | -17351.242 | 1.562   | 4100.801   | -2.581         | -6777.626 |  |
| 3                                          | -20.857                     | -54759.707 | -6.609             | -17351.242 | 1.519   | 3987.702   | -2.549         | -6693.685 |  |
| 5                                          | -20.804                     | -54620.439 | -6.609             | -17351.242 | 1.39    | 3649.118   | -2.367         | -6215.832 |  |
| 7                                          | -20.624                     | -54148.832 | -6.609             | -17351.242 | 1.176   | 3087.214   | -1.974         | -5182.321 |  |
| sr-ZORA-B3LYP-D3 / Bk: TZP C, N, O, H: DZP |                             |            |                    |            |         |            |                |           |  |
| M                                          | Bk(III).3DOPO <sup>-1</sup> |            | DOPO <sup>-1</sup> |            | Bk(III) |            | Binding Energy |           |  |
|                                            | E [au]                      | E [kj/mol] | E [au]             | E [kj/mol] | E [au]  | E [kj/mol] | [au]           | [kj/mol]  |  |
| 1                                          | -21.04                      | -55241.017 | -6.659             | -17482.172 | 1.562   | 4100.801   | -2.626         | -6895.302 |  |
| 3                                          | -21.051                     | -55270.214 | -6.659             | -17482.172 | 1.519   | 3987.702   | -2.594         | -6811.4   |  |
| 5                                          | -20.998                     | -55130.906 | -6.659             | -17482.172 | 1.39    | 3649.118   | -2.412         | -6333.508 |  |
| 7                                          | -20.818                     | -54658.427 | -6.659             | -17482.172 | 1.176   | 3087.192   | -2.018         | -5299.103 |  |

Table S15: Energies of Bk(III).3DOPO<sup>-1</sup>, DOPO<sup>-1</sup>, and Bk(III) in different multiplicities in atomic units, and kj/mol calculated at different levels theory: HF, B3LYP, and B3LYPD3 with the methodology so-ZORA.

| so-ZORA / Bk: TZP C, N, O, H: DZP |                             |            |                    |            |         |            |                |           |  |
|-----------------------------------|-----------------------------|------------|--------------------|------------|---------|------------|----------------|-----------|--|
| Methodology                       | Bk(III).3DOPO <sup>-1</sup> |            | DOPO <sup>-1</sup> |            | Bk(III) |            | Binding Energy |           |  |
|                                   | E [au]                      | E [kj/mol] | E [au]             | E [kj/mol] | E [au]  | E [kj/mol] | [au]           | [kj/mol]  |  |
| HF                                | -32.172                     | -84466.498 | -10.211            | -26808.027 | 0.310   | 813.854    | -1.850         | -4856.272 |  |
| B3LYP                             | -21.044                     | -55250.188 | -6.609             | -17351.274 | 1.184   | 3109.823   | -2.402         | -6306.188 |  |
| B3LYPD3                           | -21.238                     | -55760.656 | -6.659             | -17482.205 | 1.184   | 3109.823   | -2.447         | -6423.864 |  |

Table S16: Energies of Bk.3DOPO, DOPO, and Bk in different multiplicities in atomic units, and kj/mol calculated at different levels theory: HF, B3LYP, and B3LYP–D3 with the methodology sr–ZORA.

| sr-ZORA-HF / Bk: TZP C, N, O, H: DZP       |          |            |            |            |    |        |            |                |          |
|--------------------------------------------|----------|------------|------------|------------|----|--------|------------|----------------|----------|
| M                                          | Bk.3DOPO |            | DOPO, M: 2 |            | Bk |        |            | Binding Energy |          |
|                                            | E [au]   | E [kj/mol] | E [au]     | E [kj/mol] | M  | E [au] | E [kj/mol] | [au]           | [kj/mol] |
| 5                                          | -30.759  | -80756.931 | -10.164    | -26686.341 | 2  | -0.031 | -81.052    | -0.235         | -616.855 |
| 7                                          | -29.813  | -78273.576 | -10.164    | -26686.341 | 4  | -1.149 | -3017.811  | 1.829          | 4803.258 |
| 9                                          | -29.778  | -78181.592 | -10.164    | -26686.341 | 6  | -1.182 | -3103.892  | 1.897          | 4981.324 |
| sr-ZORA-B3LYP / Bk: TZP C, N, O, H: DZP    |          |            |            |            |    |        |            |                |          |
| M                                          | Bk.3DOPO |            | DOPO, M: 2 |            | Bk |        |            | Binding Energy |          |
|                                            | E [au]   | E [kj/mol] | E [au]     | E [kj/mol] | M  | E [au] | E [kj/mol] | [au]           | [kj/mol] |
| 5                                          | -19.404  | -50944.205 | -6.476     | -17003.444 | 2  | -0.01  | -26.679    | 0.035          | 92.805   |
| 7                                          | -19.135  | -50238.865 | -6.476     | -17003.444 | 4  | -0.313 | -822.664   | 0.607          | 1594.13  |
| 9                                          | -19.068  | -50062.556 | -6.476     | -17003.444 | 6  | -0.363 | -954.04    | 0.724          | 1901.816 |
| sr-ZORA-B3LYP–D3 / Bk: TZP C, N, O, H: DZP |          |            |            |            |    |        |            |                |          |
| M                                          | Bk.3DOPO |            | DOPO, M: 2 |            | Bk |        |            | Binding Energy |          |
|                                            | E [au]   | E [kj/mol] | E [au]     | E [kj/mol] | M  | E [au] | E [kj/mol] | [au]           | [kj/mol] |
| 5                                          | -19.598  | -51454.672 | -6.526     | -17134.537 | 2  | -0.01  | -26.679    | -0.009         | -24.382  |
| 7                                          | -19.329  | -50749.338 | -6.526     | -17134.537 | 4  | -0.313 | -822.667   | 0.563          | 1476.94  |
| 9                                          | -19.262  | -50573     | -6.526     | -17134.537 | 6  | -0.363 | -954.057   | 0.68           | 1784.668 |

Table S17: Energies of Bk.3DOPO, DOPO, and Bk in different multiplicities in atomic units, and kj/mol calculated at different levels theory: HF, B3LYP, and B3LYP–D3 with the methodology so–ZORA.

| so-ZORA: Bk: TZP C, N, O, H: DZP |          |            |         |            |        |            |                |           |  |
|----------------------------------|----------|------------|---------|------------|--------|------------|----------------|-----------|--|
| Methodology                      | Bk.3DOPO |            | DOPO    |            | Bk     |            | Binding Energy |           |  |
|                                  | E [au]   | E [kj/mol] | E [au]  | E [kj/mol] | E [au] | E [kj/mol] | [au]           | [kj/mol]  |  |
| HF                               | -32.172  | -84466.498 | -10.102 | -26523.032 | -1.646 | -4322.247  | -0.219         | -575.155  |  |
| B3LYP                            | -21.044  | -55250.188 | -6.476  | -17003.449 | -0.495 | -1299.161  | -1.12          | -2940.681 |  |
| B3LYP–D3                         | -21.238  | -55760.656 | -6.526  | -17134.542 | -0.495 | -1299.161  | -1.165         | -3057.868 |  |

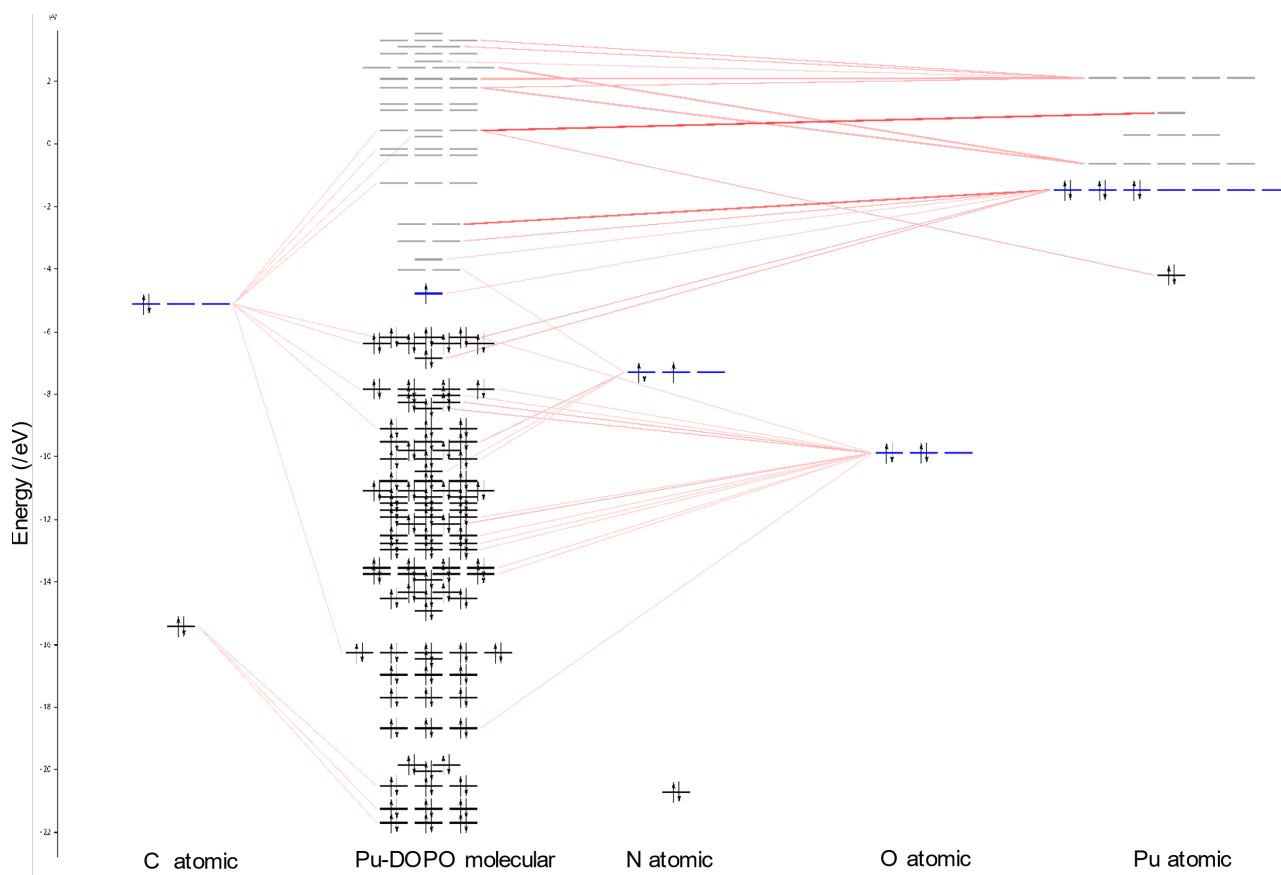

Figure S3: HOMO - LUMO Ligand Field Diagram (LFD) of the Pu-DOPO system for Pu=+4 calculated at the ZORA-DFT-D3 level of theory.

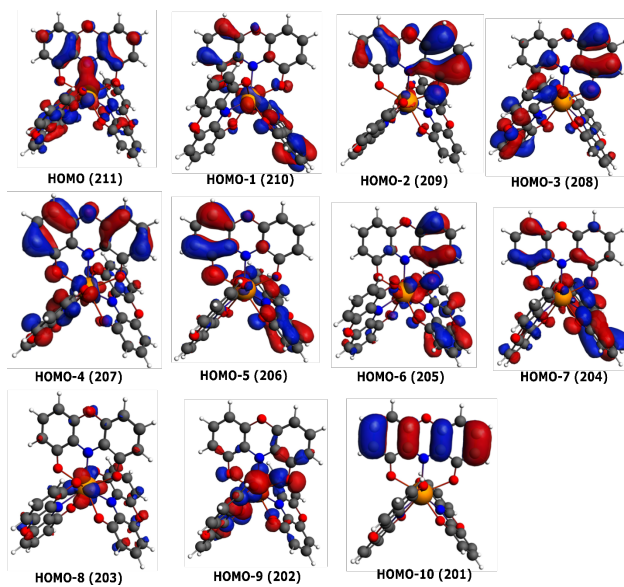

Figure S4: Pu-DOPO, HOMO and HOMO - n, where n = 1 - 10, calculated at the ZORA-DFT-D3 level of theory. The numbers in parenthesis are the labels to identify the MO number.



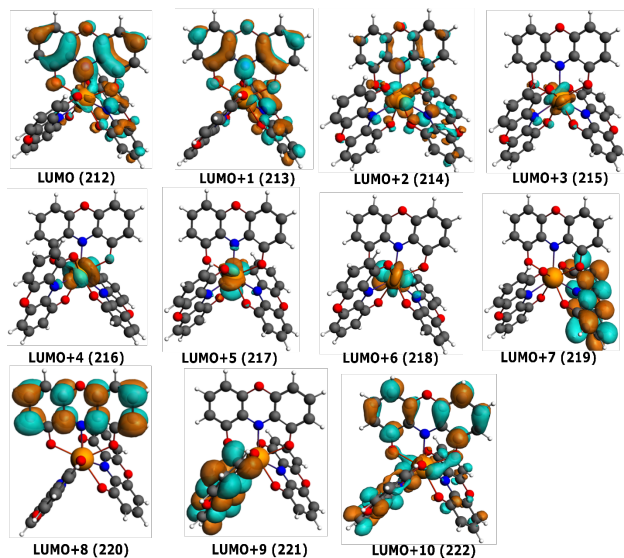

Figure S5: Pu-DOPO, LUMO, and LUMO + n, where n = 1 - 10, calculated at the ZORA-DFT-D3 level of theory. The numbers in parenthesis are the labels to identify the MO number.

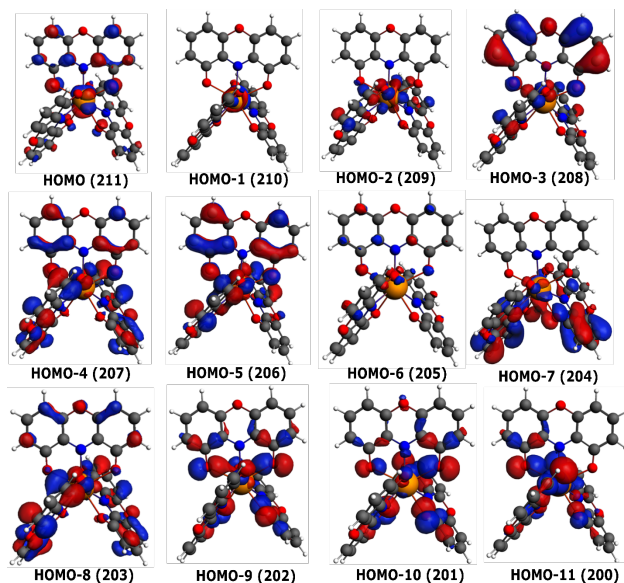

Figure S6: Am-DOPO, HOMO, and HOMO - n, where n = 1 - 11. calculated at the ZORA-DFT-D3 level of theory. The numbers in parenthesis are the labels to identify the MO number.

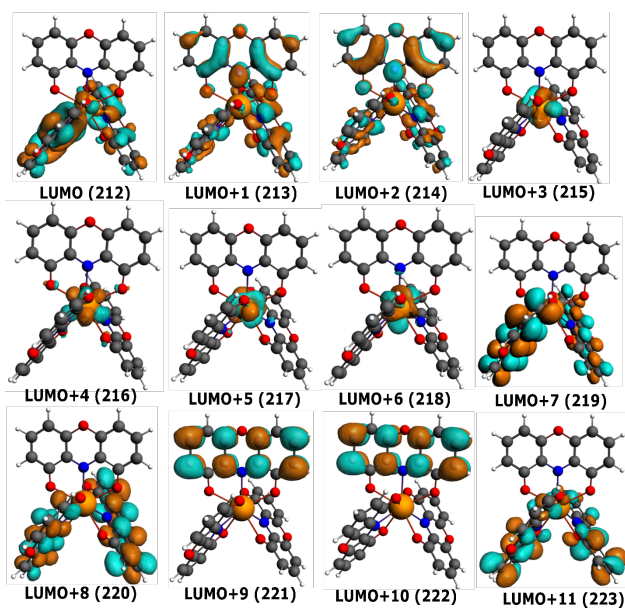

Figure S7: Am-DOPO, LUMO, and LUMO - n, where n = 1 - 11. calculated at the ZORA-DFT-D3 level of theory. The numbers in parenthesis are the labels to identify the MO number.

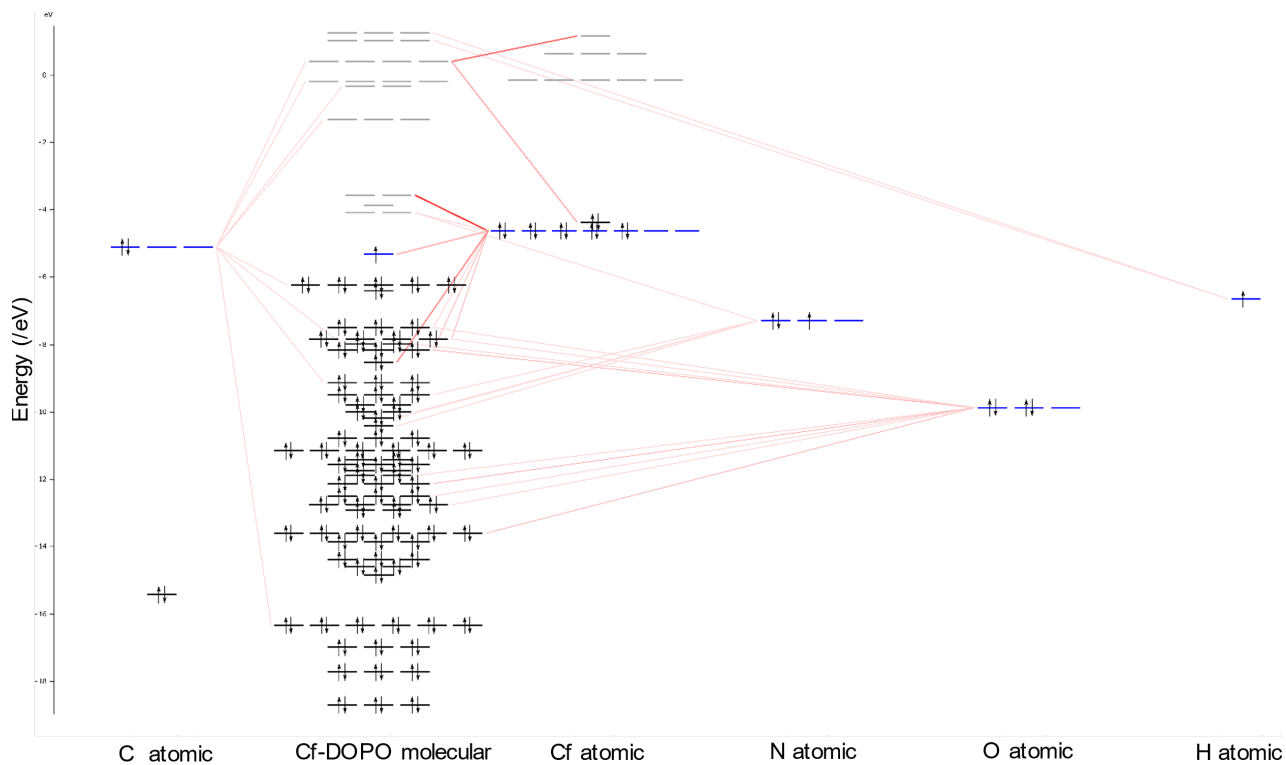

Figure S8: LFD of the Cf-DOPO system calculated at the ZORA-DFT-D3 level of theory.

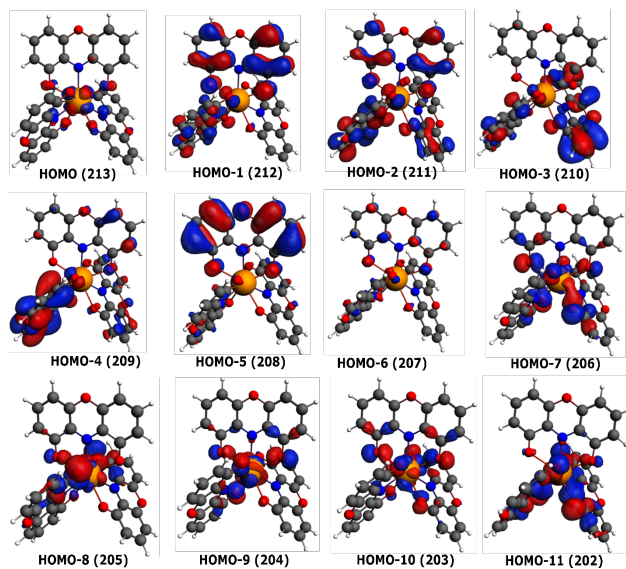

Figure S9: Cf-DOPO, HOMO, and HOMO -  $n$ , where  $n = 1 - 11$ , calculated at the ZORA-DFT-D3 level of theory. The numbers in parenthesis are the labels to identify the MO number.

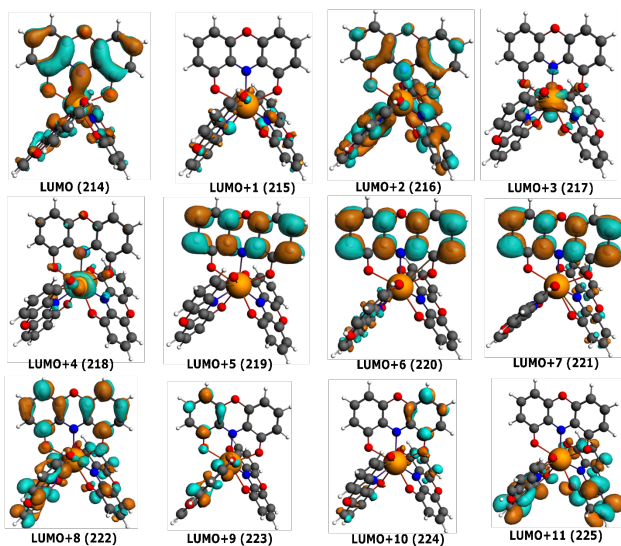

Figure S10: Cf-DOPO, LUMO, and LUMO +  $n$ , where  $n = 1 - 11$ . calculated at the ZORA-DFT-D3 level of theory. The numbers in parenthesis are the labels to identify the MO number.

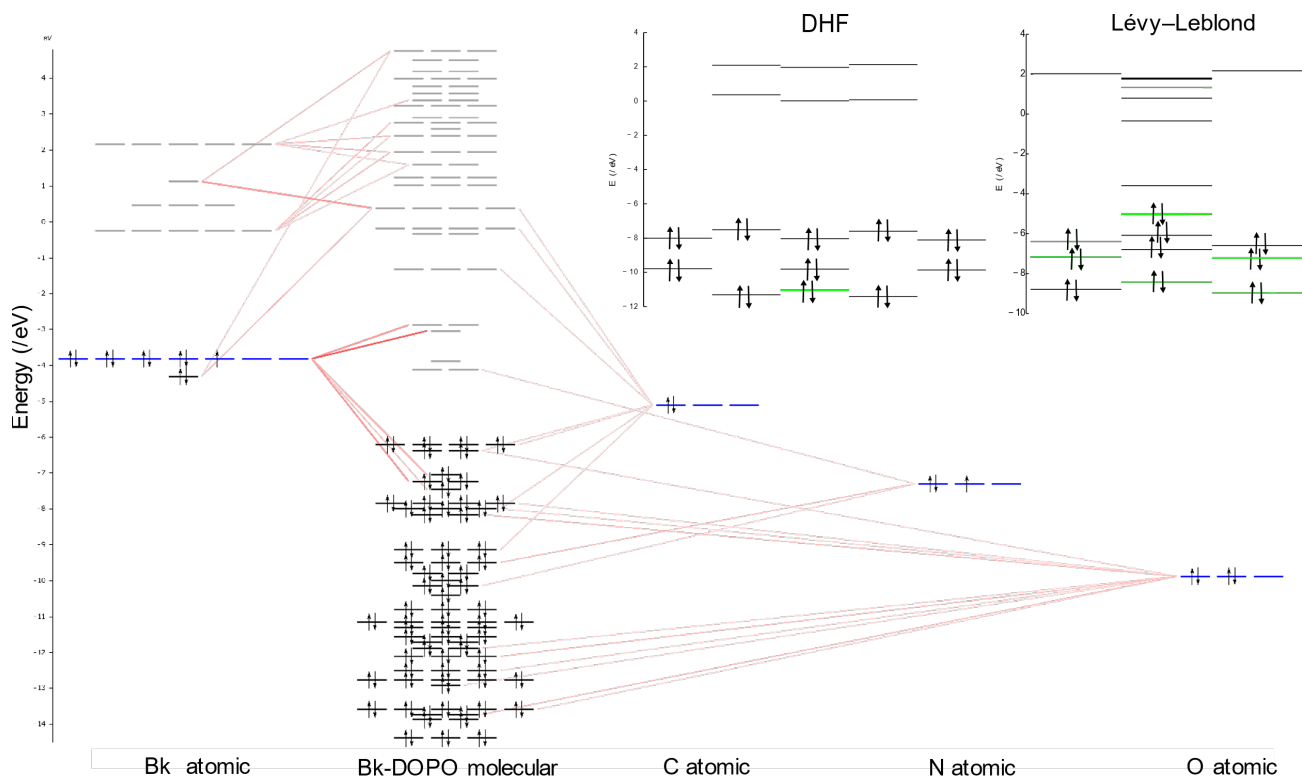

Figure S11: LFD of the Bk-DOPO system calculated at the ZORA-DFT-D3 level of theory. The insets include the energies of frontier orbitals for Bk calculated at the 4c-DHF and LL levels of theory (the line in green represents the OM with f-type primitives of Bk with significant Mulliken magnitudes). The inset with LL orbitals is included for completeness though they are unreliable. They are such that the LUMO and LUMO + 1 orbitals have negative energies.

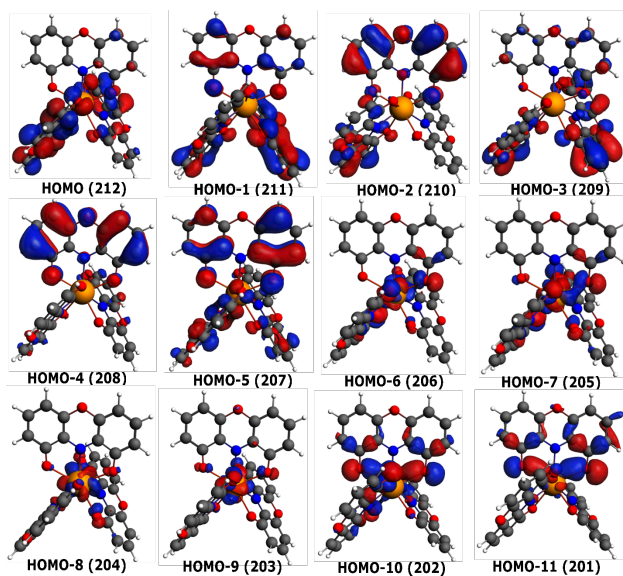

Figure S12: Bk-DOPO, HOMO, and HOMO - n, where  $n = 1 - 11$ , calculated at the ZORA-DFT-D3 level of theory. The numbers in parenthesis are the labels to identify the MO number.

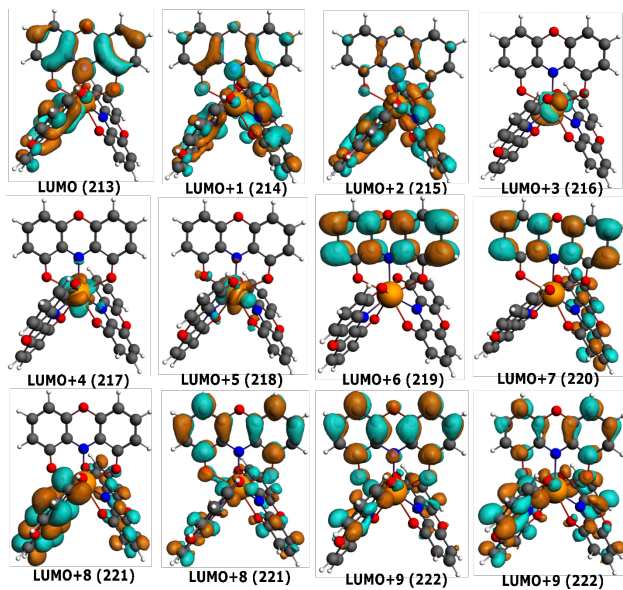

Figure S13: Bk-DOPO, LUMO, and LUMO + n, where  $n = 1 - 11$ , calculated at the ZORA-DFT-D3 level of theory. The numbers in parenthesis are the labels to identify the MO number.

## Optimized XYZ coordinates of the Actinide Complexes

- Optimized XYZ coordinates of Pu-DOPO (Pu4+) at the ZORA-DFT-D3 level of theory

|    |           |           |          |
|----|-----------|-----------|----------|
| Pu | -1.853566 | -1.082329 | 6.545622 |
| N  | 0.231261  | -2.352521 | 6.715363 |
| C  | 1.304516  | -1.824322 | 7.328421 |
| C  | 1.110719  | -0.520862 | 7.897333 |
| O  | -0.039107 | 0.036588  | 7.767367 |
| C  | 2.228012  | 0.035993  | 8.566966 |
| H  | 2.121633  | 1.014079  | 9.01673  |
| C  | 3.425044  | -0.660565 | 8.635981 |
| H  | 4.263687  | -0.210267 | 9.154345 |
| C  | 3.604396  | -1.931442 | 8.06094  |
| H  | 4.546325  | -2.457712 | 8.12209  |
| C  | 2.529949  | -2.499542 | 7.40569  |
| O  | 2.666279  | -3.752011 | 6.822526 |
| C  | 1.556551  | -4.287252 | 6.185217 |
| C  | 1.641558  | -5.525283 | 5.582079 |
| H  | 2.568648  | -6.080183 | 5.603412 |
| C  | 0.492644  | -6.027242 | 4.940941 |
| H  | 0.557342  | -6.997897 | 4.463109 |
| C  | -0.70786  | -5.336927 | 4.894375 |
| H  | -1.572753 | -5.746563 | 4.390054 |
| C  | -0.825737 | -4.064791 | 5.509034 |
| O  | -1.880832 | -3.335566 | 5.529877 |
| C  | 0.354951  | -3.563283 | 6.154727 |
| N  | -2.795678 | -0.986715 | 4.283594 |

|   |           |           |           |
|---|-----------|-----------|-----------|
| C | -2.036078 | -0.678752 | 3.225859  |
| C | -0.667567 | -0.349775 | 3.523888  |
| O | -0.290068 | -0.38231  | 4.74738   |
| C | 0.149734  | -0.022453 | 2.410578  |
| H | 1.185673  | 0.232226  | 2.590007  |
| C | -0.373998 | -0.040232 | 1.129205  |
| H | 0.272507  | 0.211172  | 0.296317  |
| C | -1.713575 | -0.376859 | 0.851264  |
| H | -2.097566 | -0.3941   | -0.158759 |
| C | -2.5334   | -0.697097 | 1.912687  |
| O | -3.856602 | -1.045673 | 1.683231  |
| C | -4.631921 | -1.384014 | 2.783684  |
| C | -5.948813 | -1.759126 | 2.603934  |
| H | -6.375988 | -1.791546 | 1.611758  |
| C | -6.697778 | -2.094604 | 3.745982  |
| H | -7.731366 | -2.391872 | 3.611378  |
| C | -6.171778 | -2.06515  | 5.028473  |
| H | -6.772921 | -2.334133 | 5.886722  |
| C | -4.823428 | -1.688274 | 5.242057  |
| O | -4.232269 | -1.631961 | 6.381435  |
| C | -4.07372  | -1.341121 | 4.068347  |
| N | -2.867508 | 0.053286  | 8.478057  |
| C | -2.975372 | -0.57161  | 9.662095  |
| C | -2.514512 | -1.930336 | 9.681443  |
| O | -2.042087 | -2.426868 | 8.593788  |
| C | -2.620427 | -2.602128 | 10.923506 |
| H | -2.284607 | -3.628617 | 10.984658 |

|   |           |           |           |
|---|-----------|-----------|-----------|
| C | -3.134027 | -1.948154 | 12.033952 |
| H | -3.197823 | -2.485386 | 12.973197 |
| C | -3.571991 | -0.6128   | 12.002539 |
| H | -3.960955 | -0.11888  | 12.881466 |
| C | -3.485507 | 0.064807  | 10.801298 |
| O | -3.903363 | 1.385639  | 10.724349 |
| C | -3.763542 | 2.033114  | 9.504938  |
| C | -4.140443 | 3.356945  | 9.384239  |
| H | -4.541772 | 3.890922  | 10.233647 |
| C | -3.981919 | 3.970983  | 8.129273  |
| H | -4.278501 | 5.008584  | 8.027373  |
| C | -3.462518 | 3.313024  | 7.024131  |
| H | -3.349435 | 3.817387  | 6.073649  |
| C | -3.061606 | 1.957556  | 7.120039  |
| O | -2.558781 | 1.252134  | 6.171764  |
| C | -3.243791 | 1.340019  | 8.403434  |

- Optimized XYZ coordinates of Am–DOPO (Am<sup>3+</sup>) at the ZORA–DFT–D3 level of theory

|    |           |           |          |
|----|-----------|-----------|----------|
| Am | -1.785561 | -1.106167 | 6.494926 |
| N  | 0.374772  | -2.419388 | 6.75503  |
| C  | 1.411583  | -1.913264 | 7.450837 |
| C  | 1.214226  | -0.600231 | 8.03199  |
| O  | 0.11128   | 0.01043   | 7.852382 |
| C  | 2.31282   | -0.091889 | 8.785322 |
| H  | 2.196676  | 0.882056  | 9.244168 |
| C  | 3.48568   | -0.816927 | 8.92953  |
| H  | 4.297928  | -0.395293 | 9.513314 |



|   |           |           |           |
|---|-----------|-----------|-----------|
| C | 3.665625  | -2.084307 | 8.350556  |
| H | 4.582311  | -2.646549 | 8.467359  |
| C | 2.615657  | -2.61088  | 7.615109  |
| O | 2.775942  | -3.865066 | 7.03607   |
| C | 1.698464  | -4.384767 | 6.327534  |
| C | 1.829372  | -5.638868 | 5.751908  |
| H | 2.753346  | -6.191479 | 5.856286  |
| C | 0.731249  | -6.146764 | 5.037938  |
| H | 0.822357  | -7.126903 | 4.580069  |
| C | -0.456997 | -5.446658 | 4.898854  |
| H | -1.288926 | -5.859891 | 4.342507  |
| C | -0.629326 | -4.155927 | 5.482021  |
| O | -1.691584 | -3.460307 | 5.406378  |
| C | 0.516431  | -3.642105 | 6.207089  |
| N | -2.878656 | -0.974112 | 4.242775  |
| C | -2.178881 | -0.61767  | 3.152734  |
| C | -0.773708 | -0.324253 | 3.356976  |
| O | -0.277842 | -0.42411  | 4.524827  |
| C | -0.046587 | 0.058955  | 2.19152   |
| H | 1.006021  | 0.284221  | 2.309572  |
| C | -0.661929 | 0.135111  | 0.952571  |
| H | -0.075951 | 0.429137  | 0.08766   |
| C | -2.026102 | -0.158824 | 0.769984  |
| H | -2.499512 | -0.10147  | -0.200996 |
| C | -2.762791 | -0.53344  | 1.878818  |
| O | -4.112534 | -0.833106 | 1.713505  |
| C | -4.827893 | -1.204689 | 2.848522  |

|   |           |           |           |
|---|-----------|-----------|-----------|
| C | -6.171264 | -1.506398 | 2.717755  |
| H | -6.646707 | -1.452263 | 1.74753   |
| C | -6.880511 | -1.876382 | 3.875889  |
| H | -7.935362 | -2.114264 | 3.782589  |
| C | -6.280529 | -1.943564 | 5.122895  |
| H | -6.845101 | -2.226601 | 6.002452  |
| C | -4.898795 | -1.637974 | 5.295787  |
| O | -4.279292 | -1.670219 | 6.407409  |
| C | -4.18208  | -1.262616 | 4.093582  |
| N | -2.856736 | 0.070032  | 8.451476  |
| C | -2.991547 | -0.543848 | 9.645465  |
| C | -2.497063 | -1.903266 | 9.725971  |
| O | -1.972953 | -2.445252 | 8.699599  |
| C | -2.644356 | -2.53568  | 10.995951 |
| H | -2.282018 | -3.551292 | 11.095108 |
| C | -3.224114 | -1.874772 | 12.067405 |
| H | -3.315809 | -2.390138 | 13.018584 |
| C | -3.697926 | -0.55575  | 11.973498 |
| H | -4.145979 | -0.043085 | 12.813975 |
| C | -3.570336 | 0.088683  | 10.753051 |
| O | -4.033456 | 1.395736  | 10.644974 |
| C | -3.877213 | 2.028341  | 9.416641  |
| C | -4.319916 | 3.335561  | 9.285971  |
| H | -4.774231 | 3.841892  | 10.126922 |
| C | -4.159703 | 3.957893  | 8.036483  |
| H | -4.506468 | 4.979984  | 7.919925  |
| C | -3.578052 | 3.317158  | 6.954088  |

|   |           |          |          |
|---|-----------|----------|----------|
| H | -3.465416 | 3.817892 | 6.000414 |
| C | -3.104223 | 1.975731 | 7.055181 |
| O | -2.548678 | 1.327172 | 6.111188 |
| C | -3.287886 | 1.34389  | 8.34581  |

- Optimized XYZ coordinate of Cf-DOPO ( $\text{Cf}^{3+}$ ) at the ZORA-DFT-D3 level of theory

|    |           |           |          |
|----|-----------|-----------|----------|
| Cf | -1.821419 | -1.113161 | 6.479169 |
| N  | 0.316255  | -2.365391 | 6.763433 |
| C  | 1.348838  | -1.824296 | 7.426487 |
| C  | 1.136811  | -0.492303 | 7.957685 |
| O  | 0.023202  | 0.08812   | 7.75693  |
| C  | 2.227517  | 0.057204  | 8.694764 |
| H  | 2.098289  | 1.04537   | 9.118493 |
| C  | 3.407601  | -0.648667 | 8.865679 |
| H  | 4.214937  | -0.198607 | 9.434752 |
| C  | 3.602142  | -1.936916 | 8.33087  |
| H  | 4.526701  | -2.481281 | 8.47     |
| C  | 2.562236  | -2.504059 | 7.616836 |
| O  | 2.731933  | -3.77949  | 7.082177 |
| C  | 1.651377  | -4.335224 | 6.402264 |
| C  | 1.778806  | -5.605681 | 5.868819 |
| H  | 2.705189  | -6.152975 | 5.981972 |
| C  | 0.674102  | -6.144969 | 5.183039 |
| H  | 0.766657  | -7.13965  | 4.758497 |
| C  | -0.519234 | -5.455198 | 5.03235  |
| H  | -1.355319 | -5.890491 | 4.4993   |
| C  | -0.687662 | -4.147199 | 5.57381  |

|   |           |           |           |
|---|-----------|-----------|-----------|
| O | -1.747373 | -3.447159 | 5.487872  |
| C | 0.462454  | -3.603037 | 6.266524  |
| N | -2.865718 | -1.000196 | 4.227534  |
| C | -2.153063 | -0.6373   | 3.14417   |
| C | -0.756152 | -0.324319 | 3.375233  |
| O | -0.28098  | -0.407458 | 4.550828  |
| C | -0.014613 | 0.059788  | 2.217452  |
| H | 1.033545  | 0.29816   | 2.349259  |
| C | -0.612711 | 0.124704  | 0.969392  |
| H | -0.014664 | 0.421757  | 0.113389  |
| C | -1.969056 | -0.181542 | 0.763026  |
| H | -2.428216 | -0.130522 | -0.215088 |
| C | -2.718978 | -0.561056 | 1.864416  |
| O | -4.061504 | -0.874271 | 1.678455  |
| C | -4.793567 | -1.237664 | 2.80358   |
| C | -6.137746 | -1.53895  | 2.651735  |
| H | -6.597945 | -1.489309 | 1.673984  |
| C | -6.86038  | -1.901931 | 3.801027  |
| H | -7.914256 | -2.139994 | 3.6948    |
| C | -6.279981 | -1.964489 | 5.058432  |
| H | -6.859767 | -2.244297 | 5.92923   |
| C | -4.900392 | -1.660304 | 5.251501  |
| O | -4.295481 | -1.687124 | 6.370878  |
| C | -4.169887 | -1.29114  | 4.056504  |
| N | -2.824831 | 0.0279    | 8.453875  |
| C | -2.957259 | -0.604837 | 9.634051  |
| C | -2.511495 | -1.983569 | 9.669205  |

|   |           |           |           |
|---|-----------|-----------|-----------|
| O | -2.035455 | -2.516706 | 8.617346  |
| C | -2.644344 | -2.635684 | 10.931838 |
| H | -2.317327 | -3.665659 | 11.002085 |
| C | -3.166088 | -1.974314 | 12.032811 |
| H | -3.247382 | -2.505549 | 12.97621  |
| C | -3.591334 | -0.635556 | 11.981485 |
| H | -3.990615 | -0.124102 | 12.84689  |
| C | -3.476252 | 0.029115  | 10.770882 |
| O | -3.886825 | 1.357259  | 10.699753 |
| C | -3.732911 | 2.00786   | 9.479883  |
| C | -4.113377 | 3.337758  | 9.380834  |
| H | -4.520074 | 3.853415  | 10.240307 |
| C | -3.949025 | 3.97218   | 8.138023  |
| H | -4.245851 | 5.012486  | 8.046753  |
| C | -3.422021 | 3.324079  | 7.03039   |
| H | -3.303124 | 3.838141  | 6.084553  |
| C | -3.01258  | 1.961028  | 7.100328  |
| O | -2.506959 | 1.295706  | 6.138825  |
| C | -3.202245 | 1.318601  | 8.383106  |

- Optimized XYZ coordinate of Bk–DOPO (Bk<sup>3+</sup>) at the ZORA–DFT–D3 level of theory

|    |           |           |          |
|----|-----------|-----------|----------|
| Bk | -1.810974 | -1.116162 | 6.468044 |
| N  | 0.316269  | -2.385803 | 6.741477 |
| C  | 1.334894  | -1.862125 | 7.444984 |
| C  | 1.122102  | -0.536575 | 7.988004 |
| O  | 0.018539  | 0.06062   | 7.763284 |
| C  | 2.19698   | -0.002081 | 8.755293 |

|   |           |           |           |
|---|-----------|-----------|-----------|
| H | 2.064327  | 0.98277   | 9.185435  |
| C | 3.368482  | -0.717742 | 8.946906  |
| H | 4.165303  | -0.279229 | 9.539178  |
| C | 3.565133  | -2.000381 | 8.402146  |
| H | 4.482009  | -2.55382  | 8.555809  |
| C | 2.538532  | -2.551229 | 7.655885  |
| O | 2.715257  | -3.818622 | 7.10702   |
| C | 1.648043  | -4.361052 | 6.39493   |
| C | 1.785125  | -5.628419 | 5.85842   |
| H | 2.706754  | -6.17864  | 5.994181  |
| C | 0.69691   | -6.161648 | 5.141368  |
| H | 0.797275  | -7.154555 | 4.714395  |
| C | -0.488607 | -5.467427 | 4.966069  |
| H | -1.314158 | -5.896269 | 4.411859  |
| C | -0.669273 | -4.159319 | 5.509499  |
| O | -1.729497 | -3.467165 | 5.400495  |
| C | 0.466584  | -3.61957  | 6.233483  |
| N | -2.86143  | -1.002816 | 4.267873  |
| C | -2.168831 | -0.606491 | 3.180887  |
| C | -0.787137 | -0.266814 | 3.414248  |
| O | -0.322667 | -0.353204 | 4.602899  |
| C | -0.049314 | 0.139916  | 2.267495  |
| H | 0.993991  | 0.397981  | 2.401169  |
| C | -0.650058 | 0.204912  | 1.0176    |
| H | -0.058332 | 0.521251  | 0.164212  |
| C | -1.999958 | -0.124542 | 0.810131  |
| H | -2.459552 | -0.072162 | -0.167878 |

|   |           |           |           |
|---|-----------|-----------|-----------|
| C | -2.743331 | -0.529874 | 1.90844   |
| O | -4.08304  | -0.868922 | 1.72605   |
| C | -4.796735 | -1.262672 | 2.856538  |
| C | -6.136787 | -1.594066 | 2.720762  |
| H | -6.612863 | -1.545629 | 1.750436  |
| C | -6.834871 | -1.987239 | 3.874709  |
| H | -7.883975 | -2.249612 | 3.780115  |
| C | -6.234243 | -2.050068 | 5.125258  |
| H | -6.795037 | -2.352907 | 6.000831  |
| C | -4.862464 | -1.715938 | 5.295519  |
| O | -4.226372 | -1.737771 | 6.406134  |
| C | -4.161625 | -1.319375 | 4.100585  |
| N | -2.839815 | 0.05731   | 8.413545  |
| C | -2.960879 | -0.569818 | 9.600408  |
| C | -2.513979 | -1.945373 | 9.639608  |
| O | -2.041388 | -2.480707 | 8.583566  |
| C | -2.641577 | -2.597378 | 10.900097 |
| H | -2.314986 | -3.627406 | 10.969783 |
| C | -3.156905 | -1.933782 | 12.003365 |
| H | -3.234253 | -2.463563 | 12.947721 |
| C | -3.579991 | -0.595184 | 11.950901 |
| H | -3.974166 | -0.081288 | 12.817211 |
| C | -3.471707 | 0.067107  | 10.738079 |
| O | -3.882085 | 1.393625  | 10.665208 |
| C | -3.732908 | 2.042058  | 9.443066  |
| C | -4.111855 | 3.371558  | 9.349616  |
| H | -4.511183 | 3.885322  | 10.21361  |

|   |           |          |          |
|---|-----------|----------|----------|
| C | -3.95699  | 4.008612 | 8.105808 |
| H | -4.253829 | 5.049309 | 8.018882 |
| C | -3.440847 | 3.362178 | 6.994604 |
| H | -3.329589 | 3.876451 | 6.047962 |
| C | -3.030287 | 1.995835 | 7.055579 |
| O | -2.536756 | 1.340895 | 6.085558 |
| C | -3.210807 | 1.34999  | 8.341711 |

- Optimized XYZ coordinate of Am-DOPO ( $\text{Am}^{3+}$ ) at the 4c-DHF and Basis sets: cv3z (Am, O, N)/3-21G (C, H)

|    |               |               |               |
|----|---------------|---------------|---------------|
| Am | -1.7885411139 | -1.1181810132 | 6.5105886017  |
| O  | 0.1008861911  | -0.0626910297 | 7.8471396288  |
| O  | 2.7900340644  | -3.8454037162 | 7.0416925172  |
| O  | -1.617269279  | -3.4139735975 | 5.4358915904  |
| O  | -0.3582016293 | -0.4802612793 | 4.5157867879  |
| O  | -4.1147635962 | -0.8421393349 | 1.6991081373  |
| O  | -4.2690641397 | -1.6264368314 | 6.3374399916  |
| O  | -2.0348304957 | -2.3903356039 | 8.6938662172  |
| O  | -4.0189893219 | 1.3937723983  | 10.6749035503 |
| O  | -2.5645859576 | 1.2849985941  | 6.1975464459  |
| N  | 0.4494852506  | -2.4627641672 | 6.7879771286  |
| N  | -2.9302960824 | -0.9820055415 | 4.1529305029  |
| N  | -2.8901707813 | 0.1115314702  | 8.5465370166  |
| C  | 1.4307869459  | -1.9323495606 | 7.4571669485  |
| C  | 1.1981830975  | -0.6146241381 | 8.0241738247  |
| C  | 2.3019766795  | -0.0665192437 | 8.7518878942  |
| C  | 3.4599142865  | -0.7729917991 | 8.8687172895  |



|   |               |               |               |
|---|---------------|---------------|---------------|
| C | 3.682311307   | -2.0650653591 | 8.3072027405  |
| C | 2.6698479739  | -2.6286046304 | 7.6094190579  |
| C | 1.7675308484  | -4.3865373804 | 6.348616939   |
| C | 1.8674931778  | -5.6027865838 | 5.7654519914  |
| C | 0.7321690639  | -6.0897508177 | 5.0525826208  |
| C | -0.4430065854 | -5.4163412279 | 4.9145412276  |
| C | -0.600585786  | -4.1233387715 | 5.5052672736  |
| C | 0.5576602115  | -3.6356177387 | 6.2342809809  |
| C | -2.2122656999 | -0.6510147778 | 3.1200955915  |
| C | -0.8066757643 | -0.376187277  | 3.3627000944  |
| C | -0.0545565851 | -0.0055893646 | 2.2039500416  |
| C | -0.6647748805 | 0.0636021159  | 0.9893777258  |
| C | -2.0439352436 | -0.2141065445 | 0.7574856615  |
| C | -2.8007638217 | -0.5661073093 | 1.8217702275  |
| C | -4.8482181517 | -1.1946146881 | 2.7739873341  |
| C | -6.165234797  | -1.486810443  | 2.6747702652  |
| C | -6.8561290569 | -1.8418363742 | 3.8705486391  |
| C | -6.2860086506 | -1.9047488845 | 5.1049776682  |
| C | -4.8965796446 | -1.6063226266 | 5.2667234323  |
| C | -4.1983346383 | -1.2507687704 | 4.0438934953  |
| C | -3.0184752128 | -0.5234874829 | 9.6751374442  |
| C | -2.5357565654 | -1.8934318521 | 9.7148851579  |
| C | -2.6946394114 | -2.5552416623 | 10.9735426452 |
| C | -3.258412705  | -1.8972990337 | 12.0229023815 |
| C | -3.7258578194 | -0.5508279886 | 11.9784919278 |
| C | -3.6040542385 | 0.1182442977  | 10.8093002104 |
| C | -3.8807330957 | 2.0439114022  | 9.5017932899  |

|   |               |               |               |
|---|---------------|---------------|---------------|
| C | -4.290875013  | 3.3228654751  | 9.3436113526  |
| C | -4.1044279677 | 3.9243630122  | 8.064175276   |
| C | -3.5427678057 | 3.303222272   | 6.9915647354  |
| C | -3.0875443131 | 1.9516858487  | 7.1041466681  |
| C | -3.2858365579 | 1.3434265869  | 8.4087094043  |
| H | 2.1901782651  | 0.9039064794  | 9.1879997054  |
| H | 4.2718405664  | -0.3361016774 | 9.4178724438  |
| H | 4.6178322455  | -2.5670414833 | 8.4326780782  |
| H | 2.7633079653  | -6.1812148839 | 5.8373025428  |
| H | 0.8228627325  | -7.0567166376 | 4.5967354484  |
| H | -1.2653485483 | -5.827798546  | 4.3675208346  |
| H | 0.9857429014  | 0.2136391938  | 2.3224505696  |
| H | -0.0761265669 | 0.3455003762  | 0.1378076532  |
| H | -2.4625534794 | -0.1452342117 | -0.2230903466 |
| H | -6.6745624076 | -1.4438984243 | 1.7365381306  |
| H | -7.9006637559 | -2.0690557943 | 3.7790561238  |
| H | -6.8509790108 | -2.1794352001 | 5.9709773823  |
| H | -2.3614440459 | -3.5682141636 | 11.0598340907 |
| H | -3.3649555418 | -2.4184018423 | 12.9550120496 |
| H | -4.1595014165 | -0.0897992721 | 12.8396462802 |
| H | -4.7447346707 | 3.8633771228  | 10.1458835298 |
| H | -4.4263121099 | 4.9419676317  | 7.9537495028  |
| H | -3.4264598122 | 3.8012193042  | 6.0519814064  |

- Optimized XYZ coordinate of Am–DOPO (Am<sup>3+</sup>) at the Lévy–Leblond and Basis sets:  
cv3z (Am, O, N)/3-21G (C, H)

|    |               |              |              |
|----|---------------|--------------|--------------|
| Am | -1.8533614345 | -1.216416141 | 6.5237504911 |
|----|---------------|--------------|--------------|

|   |               |               |               |
|---|---------------|---------------|---------------|
| O | 0.1439312513  | -0.1160390437 | 7.8550716779  |
| O | 2.8538885039  | -3.8901902994 | 7.0556432785  |
| O | -1.5500085338 | -3.5041091367 | 5.4446528486  |
| O | -0.4207532755 | -0.4693998093 | 4.4670041124  |
| O | -4.1646137187 | -0.8393363029 | 1.6297829881  |
| O | -4.3385121106 | -1.7153995218 | 6.250413859   |
| O | -2.1295649605 | -2.3765214609 | 8.7789318027  |
| O | -3.9913598451 | 1.4782050709  | 10.7356267509 |
| O | -2.6113284874 | 1.2839968546  | 6.2349833076  |
| N | 0.5036227783  | -2.5236657112 | 6.7998002027  |
| N | -2.9868813841 | -1.0067858791 | 4.0864604045  |
| N | -2.9331946692 | 0.1413181758  | 8.6032314432  |
| C | 1.4723003643  | -1.9900776276 | 7.4722489645  |
| C | 1.2321567539  | -0.6666785391 | 8.0432880973  |
| C | 2.3306672703  | -0.1207435257 | 8.7881477753  |
| C | 3.4862843401  | -0.8239284916 | 8.9119887413  |
| C | 3.7189812005  | -2.116226366  | 8.3435636029  |
| C | 2.7202034286  | -2.6810513146 | 7.6334087151  |
| C | 1.8424467675  | -4.4342176276 | 6.347752253   |
| C | 1.966872996   | -5.6436604125 | 5.74730475    |
| C | 0.8509291299  | -6.1327008757 | 5.014473691   |
| C | -0.3334422953 | -5.4695312567 | 4.8799977201  |
| C | -0.5150278322 | -4.196811987  | 5.5007960555  |
| C | 0.6271582633  | -3.7017919306 | 6.2365572709  |
| C | -2.2732090674 | -0.6432761236 | 3.0682998296  |
| C | -0.8667967869 | -0.3479368502 | 3.3206572079  |
| C | -0.1199053112 | 0.0683932993  | 2.16990728    |

|   |               |               |               |
|---|---------------|---------------|---------------|
| C | -0.7279512992 | 0.1521323085  | 0.9574494988  |
| C | -2.1047222674 | -0.1469675991 | 0.7140199215  |
| C | -2.8590722171 | -0.5370698715 | 1.7642043204  |
| C | -4.900452797  | -1.2145711159 | 2.695570783   |
| C | -6.2167069758 | -1.5199046578 | 2.5787094316  |
| C | -6.9092049146 | -1.90776081   | 3.7579351843  |
| C | -6.3427145377 | -1.9875303812 | 4.9953672833  |
| C | -4.9602735809 | -1.6770354984 | 5.1701489246  |
| C | -4.2597092963 | -1.2891233793 | 3.9649908222  |
| C | -3.0549238858 | -0.4769755696 | 9.750847596   |
| C | -2.6063175355 | -1.8525911729 | 9.803824109   |
| C | -2.7528416266 | -2.4905474177 | 11.0723449679 |
| C | -3.2842621495 | -1.8050963462 | 12.124620535  |
| C | -3.7223442308 | -0.4526683785 | 12.0660266881 |
| C | -3.602662238  | 0.1945918772  | 10.8815605926 |
| C | -3.8589978005 | 2.1095444906  | 9.5535412497  |
| C | -4.2348060009 | 3.3956261755  | 9.3855399388  |
| C | -4.0488858046 | 3.9810932014  | 8.0944010839  |
| C | -3.5201570109 | 3.3360183561  | 7.0210201521  |
| C | -3.1040386994 | 1.9688734414  | 7.1378301991  |
| C | -3.2984785948 | 1.376433819   | 8.4566653866  |
| H | 2.2104857864  | 0.8454306505  | 9.2301983007  |
| H | 4.290787535   | -0.3899178226 | 9.4718092862  |
| H | 4.6545807069  | -2.6138784464 | 8.4772649942  |
| H | 2.8717894049  | -6.2070299424 | 5.8177642926  |
| H | 0.95962446    | -7.0870223258 | 4.5358976005  |
| H | -1.1439944021 | -5.8795337196 | 4.3156091322  |

|   |               |               |               |
|---|---------------|---------------|---------------|
| H | 0.9150928972  | 0.3070935158  | 2.2974137658  |
| H | -0.1439789907 | 0.4645486231  | 0.1140332746  |
| H | -2.5195877838 | -0.0636499066 | -0.266219845  |
| H | -6.715026415  | -1.4724536446 | 1.6348369696  |
| H | -7.9517057049 | -2.1499688009 | 3.6562209925  |
| H | -6.9092542361 | -2.2844179474 | 5.8528990926  |
| H | -2.4399198096 | -3.5093617217 | 11.1676691899 |
| H | -3.3832904474 | -2.3101267279 | 13.0651850255 |
| H | -4.1309673573 | 0.0336872457  | 12.9243349579 |
| H | -4.6540641073 | 3.9606681559  | 10.1892738958 |
| H | -4.3502038884 | 5.002757871   | 7.9781171105  |
| H | -3.39908752   | 3.8224933064  | 6.0765411736  |

- Optimized XYZ coordinate of Bk–DOPO (Bk<sup>3+</sup>) at the 4c-DHF and Basis sets: cv3z (Bk, O, N)/3-21G (C, H)

|    |               |               |               |
|----|---------------|---------------|---------------|
| Bk | -1.792918281  | -1.1195216484 | 6.4834859669  |
| O  | 0.0231646034  | -0.0068858064 | 7.8168625246  |
| O  | -1.6489519974 | -3.4203559101 | 5.3750046496  |
| O  | 2.7134203874  | -3.8087819839 | 7.1132277438  |
| O  | -0.3306867192 | -0.4669100428 | 4.5681937294  |
| O  | -4.0865000525 | -0.8382321892 | 1.7638239782  |
| O  | -4.2219637686 | -1.6689455377 | 6.3898148308  |
| O  | -3.9103485647 | 1.3707460135  | 10.6412195808 |
| O  | -1.9925755559 | -2.4202886241 | 8.6138311327  |
| O  | -2.5603411724 | 1.2995135761  | 6.126921076   |
| N  | 0.3850693362  | -2.4266602102 | 6.7726577265  |
| N  | -2.8372362235 | 0.0927387372  | 8.4813193137  |

|   |               |               |              |
|---|---------------|---------------|--------------|
| N | -2.8921749803 | -0.9882568729 | 4.2131704252 |
| C | 1.3529334921  | -1.8866376568 | 7.4588398777 |
| C | 1.116730653   | -0.5609114873 | 8.0118537681 |
| C | 2.2035313648  | -0.014963972  | 8.7608153598 |
| C | 3.3568193213  | -0.7239566026 | 8.9168371968 |
| C | 3.5816703774  | -2.0199011245 | 8.376253583  |
| C | 2.5825818223  | -2.5845027171 | 7.657241959  |
| C | 1.7101773784  | -4.3622307036 | 6.4089715089 |
| C | 1.8244347978  | -5.5922337694 | 5.8598440113 |
| C | 0.7133097834  | -6.0980150829 | 5.1237291572 |
| C | -0.4538752626 | -5.4261478421 | 4.934172682  |
| C | -0.6363435719 | -4.1201435131 | 5.4926139207 |
| C | 0.5044343977  | -3.6065826685 | 6.2469665606 |
| C | -2.1857415529 | -0.6367151237 | 3.180879536  |
| C | -0.7779841084 | -0.3506433742 | 3.4173795678 |
| C | -0.0365163349 | 0.0405723521  | 2.2611973846 |
| C | -0.6528507552 | 0.1186107342  | 1.0483402103 |
| C | -2.0291695938 | -0.1698359755 | 0.8216324515 |
| C | -2.778777547  | -0.5432301368 | 1.8846144609 |
| C | -4.8124892529 | -1.206003927  | 2.8360766705 |
| C | -6.1283382177 | -1.5074350599 | 2.737134062  |
| C | -6.8136898749 | -1.8854554792 | 3.926301256  |
| C | -6.2372072592 | -1.9612337571 | 5.1587195869 |
| C | -4.8525592482 | -1.6524381993 | 5.3227955931 |
| C | -4.1560288547 | -1.2723114158 | 4.1028092712 |
| C | -2.9536286582 | -0.5489808659 | 9.6112839391 |
| C | -2.483571389  | -1.9245889081 | 9.6421521366 |

|   |               |               |               |
|---|---------------|---------------|---------------|
| C | -2.6284556539 | -2.5860999379 | 10.8989533977 |
| C | -3.1700367621 | -1.9288774375 | 11.9637333457 |
| C | -3.6219569417 | -0.581473982  | 11.9297902526 |
| C | -3.5080769593 | 0.0911489817  | 10.7595187949 |
| C | -3.7820888834 | 2.0297697967  | 9.4755283509  |
| C | -4.1707207449 | 3.3170768418  | 9.3432820472  |
| C | -4.0005156263 | 3.936953451   | 8.0700035434  |
| C | -3.4757282166 | 3.3200582491  | 6.9782005906  |
| C | -3.0442367448 | 1.9556287299  | 7.0544334316  |
| C | -3.2199908173 | 1.3248209405  | 8.3613162908  |
| H | -3.3663533437 | 3.8296378778  | 6.0444455298  |
| H | -4.3105919981 | 4.9591135626  | 7.9779818789  |
| H | -4.5899009984 | 3.8497089988  | 10.1688861382 |
| H | -4.0380455354 | -0.1106054472 | 12.7937554228 |
| H | -3.2657095794 | -2.4556822206 | 12.8926343599 |
| H | -2.3035984197 | -3.602157239  | 10.9745707148 |
| H | -6.7975099586 | -2.2512876068 | 6.0220101302  |
| H | -7.8550499387 | -2.1245145688 | 3.836342627   |
| H | -6.6315040774 | -1.4626075293 | 1.7960196794  |
| H | 2.0824361322  | 0.9582489209  | 9.1872197218  |
| H | -2.459714083  | -0.0944841046 | -0.1529246475 |
| H | -0.0686845489 | 0.415077218   | 0.1996355136  |
| H | 1.0017978936  | 0.2689618203  | 2.3780619646  |
| H | -1.2601323554 | -5.8494680118 | 4.3733355107  |
| H | 0.8148406377  | -7.0749707533 | 4.6940694493  |
| H | 2.7195802903  | -6.1628885975 | 5.9769326049  |
| H | 4.5054402372  | -2.5343306263 | 8.5276853528  |

|   |              |               |              |
|---|--------------|---------------|--------------|
| H | 4.1532940778 | -0.2837345519 | 9.4836546138 |
|---|--------------|---------------|--------------|

- Optimized XYZ coordinate of Bk-DOPO (Bk<sup>3+</sup>) at the Lévy-Leblond and Basis sets: cv3z (Bk, O, N)/3-21G (C, H)

|    |               |               |               |
|----|---------------|---------------|---------------|
| Bk | -1.8106397041 | -1.1137940906 | 6.4711150542  |
| O  | 0.0739823578  | 0.0716753047  | 7.798809894   |
| O  | -1.6999294023 | -3.5140757289 | 5.4047003683  |
| O  | 2.6935115515  | -3.8133408619 | 7.1038580276  |
| O  | -0.2994572375 | -0.3243391824 | 4.5499793458  |
| O  | -4.0676439571 | -0.8716176785 | 1.7541883242  |
| O  | -4.2795984272 | -1.7652800036 | 6.3937872363  |
| O  | -3.8787564699 | 1.3869421361  | 10.6544901692 |
| O  | -2.0478446091 | -2.4829664278 | 8.6442169086  |
| O  | -2.5433081138 | 1.383226823   | 6.1164377642  |
| N  | 0.3550510334  | -2.3956042435 | 6.7533582355  |
| N  | -2.8573791243 | 0.0842832492  | 8.4596815244  |
| N  | -2.8807679704 | -1.0007015972 | 4.2297018707  |
| C  | 1.3253313561  | -1.8691857804 | 7.4313263784  |
| C  | 1.1180863788  | -0.5104944133 | 7.9876939146  |
| C  | 2.2338011006  | 0.004659738   | 8.7496967075  |
| C  | 3.3714074546  | -0.7135041786 | 8.9200852771  |
| C  | 3.5656266803  | -2.021537489  | 8.373181053   |
| C  | 2.562740206   | -2.5728115561 | 7.6522418556  |
| C  | 1.6605739169  | -4.358750447  | 6.4105094314  |
| C  | 1.7750387212  | -5.6177085264 | 5.8779429078  |
| C  | 0.6754583719  | -6.1661823313 | 5.1586031591  |
| C  | -0.4906820266 | -5.4948505221 | 4.9807217933  |



|   |               |               |               |
|---|---------------|---------------|---------------|
| C | -0.6863980938 | -4.1574738657 | 5.5216773811  |
| C | 0.4779848268  | -3.6083130484 | 6.2541414876  |
| C | -2.180579245  | -0.6059709205 | 3.1930401522  |
| C | -0.7843073084 | -0.24796224   | 3.4203460989  |
| C | -0.068026891  | 0.1734204958  | 2.2439995069  |
| C | -0.6758499297 | 0.2325107863  | 1.0163875596  |
| C | -2.0290871432 | -0.112829508  | 0.8136949214  |
| C | -2.7629532481 | -0.5266576635 | 1.9035458397  |
| C | -4.7905150829 | -1.2700119098 | 2.8335247319  |
| C | -6.1140041815 | -1.6114803129 | 2.6934776343  |
| C | -6.8148164816 | -2.0174285264 | 3.8481341228  |
| C | -6.2380106635 | -2.0827956666 | 5.0922699664  |
| C | -4.8592344826 | -1.7384459609 | 5.3033037127  |
| C | -4.1445454747 | -1.3247007092 | 4.1015035003  |
| C | -2.9666539138 | -0.5553628141 | 9.5965236384  |
| C | -2.5166174629 | -1.9561261847 | 9.6390278861  |
| C | -2.664667747  | -2.5999740257 | 10.92184895   |
| C | -3.1780477568 | -1.93706208   | 11.9923401382 |
| C | -3.6015096083 | -0.577839067  | 11.9402981506 |
| C | -3.4888546028 | 0.0868475016  | 10.7581606014 |
| C | -3.7394096623 | 2.0503278909  | 9.475810599   |
| C | -4.0966282011 | 3.3545509047  | 9.3658161673  |
| C | -3.9259525857 | 4.0058857824  | 8.101984405   |
| C | -3.4192216481 | 3.3875320417  | 7.0100133959  |
| C | -3.006969188  | 1.995157248   | 7.0500085438  |
| C | -3.2009082342 | 1.3321597766  | 8.3601671483  |
| H | -3.3008964203 | 3.8999851539  | 6.0780229636  |

|   |               |               |               |
|---|---------------|---------------|---------------|
| H | -4.2165449843 | 5.0357500124  | 8.0342913681  |
| H | -4.4939216879 | 3.8806952698  | 10.2070301779 |
| H | -3.9976259905 | -0.0859675262 | 12.802602277  |
| H | -3.2717679984 | -2.4506039608 | 12.9293565958 |
| H | -2.3503472752 | -3.6206806501 | 10.9954281243 |
| H | -6.8021870666 | -2.3933008048 | 5.9484040853  |
| H | -7.8488924235 | -2.2846613918 | 3.737288755   |
| H | -6.5891257503 | -1.5677126787 | 1.7365814377  |
| H | 2.1197451446  | 0.9812813333  | 9.1737827575  |
| H | -2.4801078009 | -0.0582196045 | -0.1543027852 |
| H | -0.106469546  | 0.5539912856  | 0.1651827408  |
| H | 0.9615593291  | 0.4428586238  | 2.3657712262  |
| H | -1.310124354  | -5.9212980192 | 4.4407540902  |
| H | 0.7863516611  | -7.1502668338 | 4.7497071639  |
| H | 2.6807391981  | -6.1710415868 | 6.008589574   |
| H | 4.4797366146  | -2.5531971819 | 8.5296121321  |
| H | 4.1756572742  | -0.2943455573 | 9.4925888755  |

## References

- (1) Galley, S. S.; Pattenaude, S. A.; Gaggioli, C. A.; Qiao, Y.; Sperling, J. M.; Zeller, M.; Pakhira, S.; Mendoza-Cortes, J. L.; Schelter, E. J.; Albrecht-Schmitt, T. E., et al. Synthesis and characterization of tris-chelate complexes for understanding f-orbital bonding in later actinides. Journal of the American Chemical Society **2019**, 141, 2356–2366.
